# Supplementary material
Source: publisher figshare collection journal article supplement (https://tandf.figshare.com/articles/dataset/_/17133719)
Supplement: Supplementary file 1 [file 1]

## Supplementary material - 2

|     |                                                                        |    |
|-----|------------------------------------------------------------------------|----|
| 1.  | Lime use in iron and steel industry.....                               | 2  |
| 2.  | Lime use in sand lime bricks.....                                      | 3  |
| 3.  | Lime use in light-weight concrete - autoclaved aerated concrete.....   | 4  |
| 4.  | Lime use in mortars.....                                               | 6  |
| 5.  | Lime use in hemp-lime.....                                             | 6  |
| 6.  | Lime use in soil stabilisation.....                                    | 6  |
| 7.  | Lime use in asphalt pavement.....                                      | 7  |
| 8.  | Lime use in drinking water.....                                        | 7  |
| 9.  | Lime use in wastewater treatment - biosolids.....                      | 8  |
| 10. | Lime use in sludge treatment - dredging sediments.....                 | 9  |
| 11. | Lime use in flue gas cleaning system.....                              | 10 |
| 12. | Lime use in acid mine drainage.....                                    | 11 |
| 13. | Lime use in agriculture.....                                           | 12 |
| 14. | Lime use in calcium carbide.....                                       | 14 |
| 15. | Lime use in base and precious metals, lithium.....                     | 14 |
| 16. | Lime use in titanium dioxide production – red gypsum.....              | 18 |
| 17. | Lime use in aluminium production – red mud.....                        | 18 |
| 18. | Lime use in pulp and paper – Precipitated Calcium Carbonate (PCC)..... | 20 |

## 1. Lime use in iron and steel industry

- 1 Bang, J.H., Lee, S.W., Jeon, C., Park, S., Song, K., Jo, W.J., Chae, S., 2016. Leaching of metal ions from blast furnace slag by using aqua regia for CO<sub>2</sub> mineralization. *Energies* 9(12), 996-1008. DOI: 10.3390/en9120996
- 2 Belhadj, E., Diliberto, C., Lecomte, A., 2012. Characterization and activation of basic oxygen furnace slag. *Cement and Concrete Composites* 34, (1), 34-40. DOI: <https://doi.org/10.1016/j.cemconcomp.2011.08.012>
- 3 Cheng, T.W. and Chiu, J.P., 2003. Fire-resistant geopolymer produced by granulated blast furnace slag. *Minerals Engineering* 16(3), 205-210. DOI: [https://doi.org/10.1016/S0892-6875\(03\)00008-6](https://doi.org/10.1016/S0892-6875(03)00008-6)
- 4 Costa, G., Baciocchi, R., Poletti, A., Pomi, R., Hills, C.D., Carey, P.J., 2007. Current status and perspectives of accelerated carbonation processes on municipal waste combustion residues. *Environ. Monit. Assess.* 135(1-3), 55-75. DOI: <https://doi.org/10.1007/s10661-007-9704-4>
- 5 Costa, G., 2009. Accelerated carbonation of minerals and industrial residues for carbon dioxide storage. Università degli Studi di Roma (via Pan et al., 2012)
- 6 Das, B., Prakash, S., Reddy, P.S.R., Misra, V.N., 2012. An overview of utilization of slag and sludge from steel industries. *Resour. Conserv. Recycl.* 50(1), 40-57. DOI: <https://doi.org/10.1016/j.resconrec.2006.05.008>
- 7 Dippenaar, R., 2004. Industrial uses of slag. The use and re-use of iron and steelmaking slags. VII International Conference on molten slags fluxes and salts. The South African Institute of Mining and Metallurgy
- 8 Georgakopoulos, E., Santos, R.M., Chiang, Y.W., Manovic, V., 2016. Influence of process parameters on carbonation rate and conversion of steelmaking slags. Introduction of the “carbonation weathering rate”. *Greenhouse Gases: Science and Technology* 6(4), 470-491. DOI: <https://doi.org/10.1002/ghg.1608>
- 9 Haug, T.A., Kleiv, R.A., Mutz, I.A., 2010. Investigating dissolution of mechanically activated olivine for carbonation purpose. *Appl. Geochem.* 25(10), 1547-1563. DOI: <https://doi.org/10.1016/j.apgeochem.2010.08.005>
- 10 IPCC, 2005. *IPCC special report on carbon dioxide capture and storage*. Available online: [https://www.ipcc.ch/site/assets/uploads/2018/03/srccs\\_wholereport-1.pdf](https://www.ipcc.ch/site/assets/uploads/2018/03/srccs_wholereport-1.pdf)
- 11 JFE, 2004. Environmental report for JFE Holding Inc. and LFE Steel Corporation. JFE: Tokyo, 2004 (via Yi et al., 2012)
- 12 Kuo, W.T., Shu, C.Y., Han, Y.W., 2014. *Electric arc furnace oxidizing slag mortar with volume stability for rapid detection*. *Construction Building Materials* 53, 635-641. DOI: <https://doi.org/10.1016/j.conbuildmat.2013.12.023>
- 13 Kuwahara, Y. and Yamashita, H., 2013. *A new catalytic opportunity for waste materials: application of waste slag-based catalyst in CO<sub>2</sub> fixation reaction*. *Journal of CO<sub>2</sub> utilization* 1, 50-59. DOI: <https://doi.org/10.1016/j.jcou.2013.03.001>
- 14 Mäkelä, M., Watkins, G., Pöykiö, R., Nurmesniemi, H., Dahl, O., 2012. Utilization of steel, pulp and paper industry solid residues in forest soil amendment: relevant physicochemical properties and heavy metal availability. *Journal of Hazardous Materials* 207-208, 21-27. DOI: <https://doi.org/10.1016/j.jhazmat.2011.02.015>
- 15 Manocha, S. and Ponchon, F., 2018. *Management of lime in steel*. *Metals* 8, 686-702. DOI: 10.3390/met8090686
- 16 Morone, M., Costa, G., Poletti, A., Pomi, R., Baciocchi, R., 2014. *Valorization of steel slag by a combined carbonation and granulation treatment*. *Minerals Engineering* 59, 82-90. DOI: <https://doi.org/10.1016/j.mineng.2013.08.009>
- 17 Motz, H., and Geiseler, J., 2001. *Products of steel slags an opportunity to save natural resources*. *Waste Management* 21(3), 285-293. DOI: [https://doi.org/10.1016/S0956-053X\(00\)00102-1](https://doi.org/10.1016/S0956-053X(00)00102-1)

- 18 National slag association. Blast furnace slag as an agricultural liming material and source of minor plant nutrients. Available online: [http://www.nationalslag.org/sites/nationalslag/files/documents/nsa\\_185-5\\_bf\\_slag\\_as\\_agricultural\\_liming\\_material.pdf](http://www.nationalslag.org/sites/nationalslag/files/documents/nsa_185-5_bf_slag_as_agricultural_liming_material.pdf) (latest access in April 2019)
- 19 Proctor, D.M., Fehling, K.A., Shay, E.C., Wittenborn, J.L., Green, J.J., Avent, C., Bigham, R.D., Connolly, M., Lee, B., Shepker, T.O., Zak, M.A., 2000. *Physical and chemical characteristics of blast furnace, basic oxygen furnace and electric arc furnace steel industry slags*. Environmental Science and Technology 34, 1576-1582. DOI: <https://doi.org/10.1021/es9906002>
- 20 Ramme, B.W., 2008. *Carbon dioxide sequestration in foamed controlled low strength materials*. United States Patent Application Publication Pub.No.: US2008/0245274 A1. Available online: <http://www.freepatentsonline.com/20080245274.pdf>
- 21 Tüfekci, M., Demirbas, A., Genc, H., 1997. *Evaluation of steel furnace slags as cement additives*. Refereed paper, Cement and Concrete Research 27(11), 1713-1717. DOI: [https://doi.org/10.1016/S0008-8846\(97\)00158-0](https://doi.org/10.1016/S0008-8846(97)00158-0)
- 22 Ukwattage, N.I., Ranjith, P.G., Li, X., 2017. *Steel-making slag for mineral sequestration of carbon dioxide by accelerated carbonation*. Measurement 97, 15-22. DOI: <https://doi.org/10.1016/j.measurement.2016.10.057>
- 23 Van Zomeren, A., van der Laan, S.R., Kobesen, H.B.A., Huijgen, W.J.J., Comans, R.N.J., 2011. Changes in mineralogical and leaching properties of converter steel slag resulting from accelerated carbonation at low CO<sub>2</sub> pressure. Waste Management 31, 2236-2244. DOI: [10.1016/j.wasman.2011.05.022](https://doi.org/10.1016/j.wasman.2011.05.022)
- 24 Vlcek, J., Tomkova, V., Ovcacikova, H., Ovcacik, F., Topinkova, M., Matejka, V., 2013. *Slags from steel production: properties and their utilization*. Metalurgija 52(3), 329-333.
- 25 Volk, G.W., Harding, R.B., Evans, C.E., 1952. *A comparison of blast furnace slag and limestone as a soil amendment*. Research Bulletin 708. Ohio agricultural experiment station. Wooster, Ohio
- 26 Wu, Z.H., Zou, Z.S., Wang, C.Z., 2005. *Application of converter slags in agriculture*. Multipurpose Util Min Resour 6, 25-28
- 27 Wu, S., Xue, Y., Ye, Q., Chen, Y., 2007. *Utilization of steel slag as aggregates for stone mastic asphalt (SMA) mixtures*. Build Environ 42(7), 2580-2585. DOI: <https://doi.org/10.1016/j.buildenv.2006.06.008>
- 28 Yi, H., Xu, G., Cheng, H., Wang, J., Wan, Y., Chen, H., 2012. *An overview of utilization of steel slag*. Procedia environmental sciences 16, 791-801. DOI: [10.1016/j.proenv.2012.10.108](https://doi.org/10.1016/j.proenv.2012.10.108)

## 2. Lime use in sand lime bricks

- 1 Anupoju, S., 2019. *Calcium silicate bricks or sand lime bricks for masonry construction*. The Constructor Civil Engineering Home. Available online: <https://theconstructor.org/building/calcium-silicate-bricks-masonry-construction/17256/>
- 2 Bundesverband kalksandstein industrie e.V., 2018. *Kalksandstein Planungshandbuch. Planung, Konstruktion, Ausführung*. Available online: [https://www.kalksandstein.de/bv\\_ksi/binaries/content/59667/file\\_planungshandbuch\\_aufgabe7\\_gesch\\_de.pdf](https://www.kalksandstein.de/bv_ksi/binaries/content/59667/file_planungshandbuch_aufgabe7_gesch_de.pdf)
- 3 Cao, W., Yang, Q.J., 2015. *The properties of the carbonated brick made of steel slag-slaked lime mixture*. Journal of Wuhan University of Technology-Mater. Sci.Ed., 30(2), 250-255. DOI: <https://doi.org/10.1007/s11595-015-1134-5>
- 4 Cicek, T., Tanriverdi, M., 2007. *Lime based steam autoclaved fly ash bricks*. Construction and Building Materials, 21(6), 1295-1300. DOI: [10.1016/j.conbuildmat.2006.01.005](https://doi.org/10.1016/j.conbuildmat.2006.01.005)
- 5 Fang, Y., Gu, Y., Kang, Q., Wen, Q., Dai, P., 2011. *Utilization of copper tailings for autoclaved sand-lime brick*. Construction and Building Materials, 25(2), 867-872. DOI: <https://doi.org/10.1016/j.conbuildmat.2010.06.100>

- 6 Gourav, K., Venkatarama Reddy, B.V., 2018. *Bond Development in Burnt Clay and Fly Ash-Lime-Gypsum Brick Masonry*. Journal of Materials in Civil Engineering 30(9), 1-10. DOI: [https://doi.org/10.1061/\(ASCE\)MT.1943-5533.0002412](https://doi.org/10.1061/(ASCE)MT.1943-5533.0002412)
- 7 Heckrodt, R.O., 2002. *Guide to the deterioration and failure of building materials. Chapter 3: Deterioration of masonry* (page 66). Institution of Civil Engineers. DOI: <https://doi.org/10.1680/gttdafofbm.31722.0003>
- 8 Ingham, J.P., 2013. *Geomaterials under the microscope. Chapter 6, Concrete products, Calcium silicate units* (pages 121-127). Academic Press, Hardcover ISBN 9780124072305. Available online: <https://www.sciencedirect.com/topics/engineering/calcium-silicate>
- 9 Institut Bauen und Umwelt e.V., 2016. Environmental Product Declaration of calcium silicate masonry units. Available online: [https://www.kalksandstein.de/bv\\_ksi/binaries/content/86126/file\\_europaeische\\_umwelt\\_produktdokumentation\\_englisch\\_21.12.2016\\_de.pdf](https://www.kalksandstein.de/bv_ksi/binaries/content/86126/file_europaeische_umwelt_produktdokumentation_englisch_21.12.2016_de.pdf)
- 11 Lieblang, P., Konrad, D., Vogdt, F.U., Schäfers, M., Eden, W., 2017. *Resource efficiency of calcium silicate units (Ressourceneffizienz des Kalksandsteins)*. Mauerwerk 21(1), 3-8. DOI: 10.1002/dama.201700716
- 12 Sahu, M.K., Singh L., 2017. *Critical review on types of bricks type 6: calcium silicate bricks*. International Journal of Mechanical and Production Engineering, 5(11), 58-60. Available online: [http://www.ijm.in/journal/journal\\_file/journal\\_pdf/2-416-151549647258-60.pdf](http://www.ijm.in/journal/journal_file/journal_pdf/2-416-151549647258-60.pdf)
- 13 The Athena, Sustainable Materials Institute, 1998. *Life Cycle Analysis of Brick and Mortar Products*. Prepared by Venta G.J., Venta Glaser & Associates, Ottawa Canada. Available online: [https://calculatelca.com/wp-content/themes/athenasmisoftware/images/LCA%20Reports/Brick\\_And\\_Mortar\\_Products.pdf](https://calculatelca.com/wp-content/themes/athenasmisoftware/images/LCA%20Reports/Brick_And_Mortar_Products.pdf)
- 14 Warren, E.E., 1917. *Manufacture and properties of sand-lime brick*. Technologic Papers of the Bureau of Standards n°85, Department of Commerce. Available online: <https://nvlpubs.nist.gov/nistpubs/nbstechnologic/nbstechnologicpaperT85.pdf>

### 3. Lime use in light-weight concrete - autoclaved aerated concrete

- 1 Chucholowski, C., Holger, M., Thienel, K-C., 2018. Improving the recyclability, environmental compatibility, and CO<sub>2</sub> balance of autoclaved aerated concrete by replacing sulfate carrier and cement with calcined clays. Ce/papers - special issue: ICAAC - 6<sup>th</sup> International Conference on Autoclaved Aerated Concrete, 2(4), 503-512. DOI: <https://doi.org/10.1002/cepa.846>
- 2 Ekaputri, J.J., Triwulan, T., Brahmantyo, D., Farid, R., Nasir, S., 2013. *Optimisation of pressure and curing time in producing autoclaved aerated concrete*. Proceeding the 6<sup>th</sup> Civil Engineering Conference in Asia Region: Embracing the Future through Sustainability, Jakarta, Indonesia, Volume, TS4C50-TS4C56. DOI: 10.13140/2.1.2505.6964
- 3 European Autoclaved Aerated Concrete Association, 2019: <https://www.eaaca.org/>
- 4 European Committee for Standardization - CEN, 2011. Specification for masonry units-Part 4: autoclaved aerated concrete masonry units. EN 771-4:2011
- 5 Huang, X., Ni, W., Cui, W., Wang, Z., Zhu, L., 2012. *Preparation of autoclaved aerated concrete using copper tailings and blast furnace slag*. Construction and Building Materials 27(1), 1-5. DOI: 10.1016/j.conbuildmat.2011.08.034
- 6 Klingner R.E., 2008. *Using Autoclaved Aerated Concrete Correctly*. MASONRY Magazine: <https://www.masonrymagazine.com/blog/2008/06/01/using-autoclaved-aerated-concrete-correctly/>
- 7 Kuever, J., Remesch, M., Rabenstein, A., Bukowski, G., Kurkowski, H., Eden, W., 2018. Removal of the greenhouse gas methane by using autoclaved aerated concrete as matrix for colonization of methane-oxidizing bacteria. Ce/papers - special issue: ICAAC - 6<sup>th</sup> International Conference on Autoclaved Aerated Concrete, 2(4), 471-475. DOI: <https://doi.org/10.1002/cepa.832>

- 8 Kurama, H., Tpocu, İ.B., Karakurt, C., 2009. *Properties of the autoclaved aerated concrete produced from coal bottom ash*. Journal of Materials Processing Technology 209 (2), 767-773. DOI: <https://doi.org/10.1016/j.jmatprotec.2008.02.044>
- 9 Łagosz, A., Szymański, P., Walczak, P., 2011. *Influence of fly ash properties on properties of autoclaved aerated concrete*. 5<sup>th</sup> International Conference on Autoclaved Aerated Concrete "Securing a sustainable future", Bydgoszcz, Poland, 14-17 September 2011. Available online: [https://www.researchgate.net/publication/260164131\\_Influence\\_of\\_the\\_fly\\_ash\\_properties\\_on\\_properties\\_of\\_autoclaved\\_aerated\\_concrete](https://www.researchgate.net/publication/260164131_Influence_of_the_fly_ash_properties_on_properties_of_autoclaved_aerated_concrete)
- 10 Łaskawiec, K., Gebarowski, P., Zapotoczna-Sytek, G., Malolepszy, J., 2011. *Fly ashes of new generation as a raw material to the production of autoclaved aerated concrete (AAC)*. 5<sup>th</sup> International Conference on Autoclaved Aerated Concrete "Securing a sustainable future", Bydgoszcz, Poland, 14-17 September 2011. Available online: <http://www.gbv.de/dms/tib-ub-hannover/723846030.pdf>
- 11 Łaskawiec, K. and Woyciechowski, P., 2018. *Effect of carbonation on the performance of autoclaved aerated concrete*. Ce/papers - special issue: ICAAC - 6<sup>th</sup> International Conference on Autoclaved Aerated Concrete, 2(4): 37-41. DOI: 10.1002/cepa.885
- 12 Lesueur, D., Mücke, F., Oeinck, H., Peter, U., Pust, Ch., Verhelst, F., 2011. *Impact of quicklime reactivity and origin on Autoclaved Aerated Concrete production*. 5<sup>th</sup> International Conference on Autoclaved Aerated Concrete "Securing a sustainable future", Bydgoszcz, Poland, 14-17 September 2011. Available online: <https://www.ttu.ee/public/e/eneli-liisma/Liisma2018/5-mezhdunarodnaya-konferentsiya-po-avtoklavnomu-gazobetonu-sbornik-dokladov-2011-pol.pdf>
- 13 Masa Group, 2019. *Autoclaved Aerated Concrete Production*. <https://www.masa-group.com/en/products/aac-production/>
- 14 MHE International LLC, 2019. *Autoclaved Aerated Concrete - Production and Manufacturing Process*. <https://www.mhe-international.com/mhe-aac-consultant/production-manufacturing-process/>
- 15 Peter, U., Nowak, P., Oeinck, H., Spicker, V., Pust, C., 2018. *Investigation of the strength development of autoclaved aerated concrete*. Ce/papers - special issue: ICAAC - 6<sup>th</sup> International Conference on Autoclaved Aerated Concrete, 2(4), 557-563. DOI: <https://doi.org/10.1002/cepa.874>
- 16 Schober, G., 2011. *Porosity in autoclaved aerated concrete (AAC): a review on pore structure, types of porosity, measurement methods and effects of porosity on properties*. 5<sup>th</sup> International Conference on Autoclaved Aerated Concrete "Securing a sustainable future", Bydgoszcz, Poland, 14-17 September 2011. Available online: <https://www.ttu.ee/public/e/eneli-liisma/Liisma2018/5-mezhdunarodnaya-konferentsiya-po-avtoklavnomu-gazobetonu-sbornik-dokladov-2011-pol.pdf>
- 17 Straube, B. and Schoch, T., 2014. *The durability of autoclaved aerated concrete*. Mauerwerk, European Journal of Masonry 18(3-4), 239-245. DOI: <https://doi.org/10.1002/dama.201400630>
- 18 Tungulin, D., Behrenberg, B., Lutter, J., Wallmeier, W., 2018. *Quicklime with defined reaction time window for aerated autoclaved concrete production*. Ce/papers - special issue: ICAAC - 6<sup>th</sup> International Conference on Autoclaved Aerated Concrete, 2(4), 223-229. DOI: <https://doi.org/10.1002/cepa.853>
- 19 Wang, C., Liu, Z., Li, J., Jiao, S., Zhang, Y., 2017. *Study on preparation of autoclaved aerated concrete using lead-zinc tailings*. Chemical Engineering Transactions, 62, 931-936. DOI: 10.3303/CET1762156
- 20 Winkels, B., Nebel, H., Raupach, M., 2018. *Carbonation of autoclaved aerated concrete containing fly ash*. Ce/papers - special issue: ICAAC - 6<sup>th</sup> International Conference on Autoclaved Aerated Concrete, 2(4), 47-51. DOI: <https://doi.org/10.1002/cepa.880>
- 21 Zapotoczna-Sytek, G., 2018. *Durability of autoclaved aerated concrete based on Polish experience*. Ce/papers - special issue: ICAAC - 6<sup>th</sup> International Conference on Autoclaved Aerated Concrete, 2(4), 53-62. DOI: <https://doi.org/10.1002/cepa.850>

#### 4. Lime use in mortars

- 1 Despotou, E., Shtiza, A., Schlegel, T., Verhelst, F., 2016. *Literature study on the rate and mechanism of carbonation of lime in mortars*. In: Mauerwerk European Journal of Masonry, 20 (2016), 2, 124-137. DOI: 10.1002/dama.201500674
- 2 Schlegel, T., Shtiza, A., 2014. *Environmental footprint study of mortars, renders and plasters formulations with no, low or high hydrated lime content*. In: 9th International Masonry Conference 2014 in Guimarães, Portugal, 7-9 July 2014.
- 3 Schlegel, T., Shtiza, A., 2016. *Lime carbonation, environmental footprint of seven mortars placed on the European market*. In: Modena, da Porto and Valluzzi (Eds) Brick and Block Masonry – Trends, Innovations and Challenges. CRC Press. ISBN 978-1-138-02999-6

#### 5. Lime use in hemp-lime

- 1 Ashraf, 2016. *Carbonation of cement-based materials: Challenges and opportunities*. In: Construction and Building Materials, 120, 558-570. DOI: 10.1016/j.conbuildmat.2016.05.080
- 2 Lawrence, M., Fodde, E., Paine, K., Walker, P., 2012. *Hygrothermal performance of an experimental hemp-lime building*. In: Key Engineering Materials, 517, 413-421. DOI: <https://doi.org/10.4028/www.scientific.net/KEM.517.413>
- 3 Lawrence, M., 2015. *Reducing the environmental impact of construction using renewable materials*. In: Journal of Renewable Materials, 3 (3), 163-174. DOI: <https://doi.org/10.7569/JRM.2015.634105>
- 4 Lawrence, R.M.H., Mays, T.J., Walker, P., D'Alaya, D., 2006. *Determination of carbonation profiles in non-hydraulic lime mortars using thermogravimetric analysis*. In: Thermochemica acta, 444, 179-189.
- 5 Shea, A., Lawrence, M., Walker, P., 2012. *Hygrothermal performance of an experimental hemp-lime building*. In Construction and Building Materials, 36, 270-275. DOI: <http://dx.doi.org/10.1016/j.conbuildmat.2012.04.123>
- 6 Walker, R., Pavia, S., Mitchell, R., 2014. *Mechanical properties and durability of hemp-lime concretes*. In: Construction and Building Materials, 61, 340-348. DOI: <http://dx.doi.org/10.1016/j.conbuildmat.2014.02.065>

#### 6. Lime use in soil stabilisation

- 1 Amadi, A.A. and Okeiyi A., 2017. *Use of quick and hydrated lime in stabilization of lateritic soil: comparative analysis of laboratory data*. International Journal of Geo-Engineering, 8(3), 1-13. DOI: 10.1186/s40703-017-0041-3
- 2 Ashraf, M.A., Hossen, M.A., Ali, M.A., Chakaraborty, B.P., 2018. *Stabilisation of soil by mixing with different percentages of lime*. Proceedings of the 4<sup>th</sup> International Conference on Civil Engineering for Sustainable Development, 9-11 February 2018, Khulna, Bangladesh. Available online: [https://www.researchgate.net/publication/323880919\\_Stabilization\\_of\\_soil\\_by\\_mixing\\_with\\_different\\_percentages\\_of\\_lime](https://www.researchgate.net/publication/323880919_Stabilization_of_soil_by_mixing_with_different_percentages_of_lime)
- 3 Bell, F.G., 1989. *Lime stabilization of clay soils*. Bulletin of the International Association of Engineering Geology, 39(1), 67-74. DOI: <https://doi.org/10.1007/BF02592537>
- 4 Cherian, C. and Arnepalli, D.N., 2015. *A critical appraisal of the role of clay mineralogy in lime stabilization*. International Journal of Geosynthetics and Ground Engineering, 1(8), 1-20. DOI: 10.1007/s40891-015-0009-3
- 5 Di Sante, M., Fratalocchi, E., Mazziere, F., Brianzoni, V., 2015. *Influence of delayed compaction on the compressibility and hydraulic conductivity of soil-lime mixtures*. Engineering Geology, 185: 131-138. DOI: <https://doi.org/10.1016/j.enggeo.2014.12.005>
- 6 Eades, J.L. and Grim, R.E., 1966. *A quick test to determine lime requirements for lime stabilization*. Highway Research Record, 139, 61-72. Available online:



- <http://onlinepubs.trb.org/Onlinepubs/hrr/1966/139/139-005.pdf>
- 7 Firoozi, A.A., Olgun, C.G., Firoozi, A.A., Baghini, M.S., 2017. *Fundamentals of soil stabilization*. International Journal of Geo-Engineering, 8(26), 1-16. DOI: <https://doi.org/10.1186/s40703-017-0064-9>
  - 8 Ingles, O.G. and Metcalf, J.B., 1972. *Soil stabilization principles and practice*. Transport and Road Research Laboratory, Volume 11, 374 pages
  - 9 Jacobson, J.R., Filz, G.M., Mitchell, J.K., 2003. *Factors affecting strength gain in lime-cement columns and development of a laboratory testing procedure*. Contract Research sponsored by Virginia Transportation Research Council, Final Contract Report. Available online: [http://www.virginiadot.org/vtrc/main/online\\_reports/pdf/03-cr16.pdf](http://www.virginiadot.org/vtrc/main/online_reports/pdf/03-cr16.pdf)
  - 10 Jha, A.K. and Sivapullaiah P.V., 2018. *Lime stabilization of soil: a physico-chemical and micro-mechanistic perspective*. Indian Geotechnical Journal, 1-9. DOI: <https://doi.org/10.1007/s40098-019-00371-9>
  - 11 Makusa, G.P., 2013. *State of the art review, Soil stabilization methods and materials*. Department of Civil, Environmental and Natural resources engineering, Division of Mining and Geotechnical Engineering, Luleå University of Technology. Available online: <https://www.diva-portal.org/smash/get/diva2:997144/FULLTEXT01.pdf>
  - 12 National Lime Association, 2004. Lime-treated soil construction manual, lime stabilization & lime modification. Bulletin 326, available online: [https://www.graymont.com/sites/default/files/pdf/tech\\_paper/lime\\_treated\\_soil\\_construction\\_manual.pdf](https://www.graymont.com/sites/default/files/pdf/tech_paper/lime_treated_soil_construction_manual.pdf)
  - 13 Prusinski, J.R. and Bhattacharja, S., 1999. *Effectiveness of Portland cement and lime in stabilizing clay soils*. Journal of the Transportation Research Board, 1652 (1), 215-227. DOI: <https://doi.org/10.3141/1652-28>
  - 14 Rogers, C.D.F. and Glendinning, S., 2000. *Lime requirement for stabilization*. Journal of the Transportation Research Board, 1721 (1), 9-18. DOI: <https://journals.sagepub.com/doi/pdf/10.3141/1721-02>

## 7. Lime use in asphalt pavement

All references on this application are in Supplementary material 1

## 8. Lime use in drinking water

- 1 Al-Mutaz, I.S. and Al-Yousef S.O.A., 1999. *Lime recovery from Riyadh Water Treatment Plants*. Proceedings of the 4<sup>th</sup> Gulf Water Conference, Bahrain, February, 13-18, 1999. Available online: [https://www.researchgate.net/publication/278620957\\_Lime\\_Recovery\\_from\\_Riyadh\\_Water\\_Treatment\\_Plants](https://www.researchgate.net/publication/278620957_Lime_Recovery_from_Riyadh_Water_Treatment_Plants)
- 2 Barakat, M.A., 2011. *New trends in removing heavy metals from industrial wastewater*. Arabian Journal of Chemistry, 4(4), 361-377. DOI: <https://doi.org/10.1016/j.arabjc.2010.07.019>
- 3 Capodaglio, A.G., Hlavínek, P., Raboni, M., 2015. *Physico-chemical technologies for nitrogen removal from wastewaters: a review*. Ambiente & Água 10(3), 481-498. DOI: 10.4136/ambiente.1618
- 4 Carmeuse, 2019. *The use of lime in water treatment*. <http://www.carmeuse.com/waste-water-treatment>
- 5 EPA - United States Environmental Protection Agency, 2011. Drinking water treatment plant residuals management technical report. Summary of residuals generation, treatment, and disposal at large community water systems. September 2011, EPA 820-R-11-003
- 6 European Commission, Joint Research Centre, 2016. Best available techniques (BAT) reference document for common wastewater and waste gas treatment/management systems in the chemical sector. JRC science for policy report. Available online: [https://eippcb.jrc.ec.europa.eu/reference/BREF/CWW\\_Bref\\_2016\\_published.pdf](https://eippcb.jrc.ec.europa.eu/reference/BREF/CWW_Bref_2016_published.pdf)

- 7 Korchuganova, O., Afonina, I., Prygorodov, P., Mokhonko, V., Kanarova, K., 2018. *Utilization of lime-softening sludge to obtain calcium nitrate*. Eastern-European Journal of Enterprise Technologies, 4(94), 46-53. DOI: 10.15587/1729-4061.2018.141007
- 8 Melidis, P., 2015. *Fluoride removal from aluminium finishing wastewater by hydroxyapatite*. Environmental Processes, 2(1), 205-213. DOI: <https://doi.org/10.1007/s40710-014-0056-0>
- 9 Metcalf & Eddy Inc., 2013. *Wastewater Engineering: treatment and resource recovery*. Edited by McGraw-Hill Education, Fifth edition, pages 1498-1502. ISBN: 9780073401188
- 10 Suez Water Technologies & Solutions, 2019. *Handbook of Industrial Water Treatment., Chapter 7: precipitation softening*. Available online: <https://www.suezwatertechnologies.com/handbook/handbook-industrial-water-treatment>
- 11 van Dijk, J.C. and Wilms, D.A., 1991. Water treatment without waste material - fundamentals and state of the art of pellet softening. J Water SRT - Aqua, 40(5): 263-280.
- 12 Van Leeuwen, J., White, D.J., Baker, R.J., Jones, C., 2011. *Reuse of water treatment residuals from lime softening, Part I: Applications for the reuse of lime sludge from water softening*. Land Contamination & Reclamation, 18(4), 393-415. DOI: 10.2462/09670513.1012

## 9. Lime use in wastewater treatment - biosolids

- 1 ADEME, 2001. *Les boues chaulées des stations d'épuration municipales - production, qualité et valeur agronomique* (Limed sludge from municipal wastewater treatment plants - production, quality and agronomic value). ISBN: 9782868175601
- 2 Andreadakis, A.D., 2000. Workshop on problems around sludge - Session 1: sludge treatments and their effects on pathogens; Treatment and disinfection of sludge using quicklime. 18-19 November 1999, Stresa, Italy. Available online: <https://ec.europa.eu/environment/archives/waste/sludge/problems.htm>
- 3 Bever, J., Peschen, N., Retzlaff, C., 1989. *Mineralogische und chemische Untersuchungen an Klärschlamm-Kalk-und Klärschlamm-Kalk-Ton Mischungen* (Mineralogical and chemical analysis of limed sewage sludge and of limed sewage sludge and clay mixtures). Abwassertechnik, Heft 3, S31-35. Available online: <https://www.kalk.de/service/publikationen/fachpublikationen/klaerschlam/>
- 4 Bonomo, L., 2008. *Trattamenti delle acque reflue* (wastewater treatment). Editor McGraw-Hill Education, 536-537 and 584-585. ISBN: 9788838665189
- 5 European Commission, 2019. Website: <https://ec.europa.eu/environment/waste/sludge/>
- 6 Hanzl, P., Ponchon, F., Van Meyel, J.P., 2010. *Sludge treatment with delayed reactivity lime-effective solution for new EU member States*. Conference Proceeding of the 2<sup>th</sup> European Conference on Sludge Management, Budapest, 9-10 September 2010
- 7 Joint Research Centre - Brinkmann, T., Santonja, G.G., Yükseler, H., Roudier, S., Sancho, L.D., 2016. Best Available Techniques (BAT) Reference Document for common waste water and waste gas treatment/management systems in the chemical sector. Industrial Emissions Directive 2010/75/EU. DOI: 10.2791/37535
- 8 Lyberatos, G., Sklyvaniotis, M., Angelakis, A., 2011. *Sewage biosolids management in EU countries: challenges and prospective*. Fresenius Environmental Bulletin 20(9), 2489-2495. Available online: [https://www.researchgate.net/publication/236274617\\_Sewage\\_biosolids\\_management\\_in\\_EU\\_countries\\_Challenges\\_and\\_prospective](https://www.researchgate.net/publication/236274617_Sewage_biosolids_management_in_EU_countries_Challenges_and_prospective)
- 9 Metcalf & Eddy|AECOM, 2013. *Wastewater Engineering: treatment and resource recovery*. Edited by McGraw-Hill Education, Fifth edition, pages 1498-1502. ISBN: 9780073401188
- 10 Willet, I.R., Jakobsen, P., Malafant, K.W.J., 1986. *Fertilizer and liming value of lime-treated sewage sludge*. Fertilizer Research 8(3), 313-328. DOI: <https://doi.org/10.1007/BF01048634>



## 10. Lime use in sludge treatment - dredging sediments

- 1 Agostini, F., Skoczylas, F., Lafhaj, Z., 2007. *About a possible valorisation in cementitious materials of polluted sediments after treatment*. Cement and Concrete Composites 29(4), 270-278. DOI: <https://doi.org/10.1016/j.cemconcomp.2006.11.012>
- 2 Amar, M., Benzerzour, M., Safhi, A.E.M., Abriak, N.E., 2018. *Durability of a cementitious matrix based on treated sediments*. Cases studies in Construction Materials 8, 258-276. DOI: <https://doi.org/10.1016/j.cscm.2018.01.007>
- 3 Bertos, M.F., Simons, S.J.R., Hills, C.D., Carey, P.J., 2004. *A review of accelerated carbonation technology in the treatment of cement-based materials and sequestration of CO<sub>2</sub>*. Journal of Hazardous Material 112(3), 193-205. DOI: 10.1016/j.jhazmat.2004.04.019
- 4 Carmeuse website: <http://www.carmeuse-waterandwaste.com/application-solutions/sediment-treatment-reuse>
- 5 Chen, Q., Ke, Y., Zhang, L., Tyrer, M., Hills, C.D., Xue, G., 2009. Application of accelerated carbonation with a combination of Na<sub>2</sub>CO<sub>3</sub> and CO<sub>2</sub> in cement-based solidification/stabilization of heavy metal-bearing sediment. Journal of Hazardous Materials, 166(1), 421-427. DOI: <https://doi.org/10.1016/j.jhazmat.2008.11.067>
- 6 Du, Y-J., Wei M-L., Reddy, K.R., Wu H-L., 2016. Effect of carbonation on leachability, strength and microstructural characteristics of KMP binder stabilized Zn and Pb contaminated soils. Chemosphere 144, 1033-1042. DOI: <https://doi.org/10.1016/j.chemosphere.2015.09.082>
- 7 Federico, A., Vitone, C., Murianni, A., 2015. *On the mechanical behaviour of dredged submarine clayey sediments stabilized with lime or cement*. Canadian Geotechnical Journal, 52(12), 2030-2040. DOI: <https://doi.org/10.1139/cgj-2015-0086>
- 8 Firoozi, A.A., Olgun, G.C., Firoozi, A.A., Baghini, M.S., 2017. *Fundamentals of soil stabilisation*. International Journal of Geo-Engineering 8 (26), 1-16. DOI: <https://doi.org/10.1186/s40703-017-0064-9>
- 9 Guha, B., Hills, C.D., Carey, P.J., MacLeod, C.L., 2006. *Leaching of mercury from carbonated and non-carbonated cement-solidified dredged sediments*. Soil and Sediment Contamination 15(6), 621-635. DOI: 10.1080/15320380600959131
- 10 Jawad, I.T., Taha, M.R., Majeed, Z.H., Khan, T.A., 2014. Soil stabilization using lime: advantages, disadvantages and proposing potential alternative. Research Journal of Applied Sciences, Engineering and Technology 8(4), 510-520. DOI: 10.19026/rjaset.8.1000
- 11 Makusa, G.P., 2015. *Stabilization-Solidification of High Water Content Dredged Sediments. Strength, Compressibility and Durability Evaluations*. Doctoral Thesis, Division of Mining and Geotechnical Engineering, Luleå University of Technology, Sweden. Available online: <https://www.diva-portal.org/smash/get/diva2:990295/FULLTEXT01.pdf>
- 12 PIANC, 2010. *Dredging and the Environment - international guidance for best practice*. PIANC 125<sup>th</sup> Anniversary Celebration in ASIA, Nayoga JAPAN, 12-14 September 2010. Oral presentation available online: <http://pianc-jp.org/en/news/images/II-1%20Mr.%20Kothe%20%28Presentation%29.pdf>
- 13 Russo, G., Deneele, D., Croce, P., Modoni, G., 2015. *Lime treatment procedures for the reuse of dredged marine sediments*. Coastal and Maritime Mediterranean Conference, Edition 3, Ferrara, Italia, 177-182. DOI: 10.5150/cmcm.2015.035
- 14 Tarabadkar, K., 2009. *Accelerated carbonation of contaminated sediments and its application*. Master of Science in Civil Engineering, University of New Hampshire. Available online: [https://pdfs.semanticscholar.org/5940/89c1f70063f906b3a0aaca24e94112b49f5d.pdf?\\_ga=2.245001221.1867771113.1565794463-1586852716.1565794463](https://pdfs.semanticscholar.org/5940/89c1f70063f906b3a0aaca24e94112b49f5d.pdf?_ga=2.245001221.1867771113.1565794463-1586852716.1565794463)
- 15 Yoobanpot, N., Pitthaya, J., Krissakorn, K., Pornkasem, J., Suksun, H., 2018. Reuse of dredged sediments as pavement materials by cement dust and lime treatment. Geomechanics and Engineering 15(4), 1005-1016. DOI: <https://doi.org/10.12989/gae.2018.15.4.1005>

- 16 Zuliani, T., Mladenović, A., Ščančar, J., Milačič, R., 2016. *Chemical characterisation of dredged sediments in relation to their potential use in civil engineering*. Environmental Monitoring and Assessment, 188 (234), 1-12. DOI: <https://doi.org/10.1007/s10661-016-5239-x>

## 11. Lime use in flue gas cleaning system

- 1 Antonioni, G., Guglielmi, D., Cozzani, V., Stramigioli, C., Corrente, D., 2014. *Modelling and simulation of an existing MSWI flue gas two-stage dry treatment*. 92(3), 242-250. DOI: [10.1016/j.psep.2013.02.005](https://doi.org/10.1016/j.psep.2013.02.005)
- 2 Belevi, H., Moench, H., 2000. *Factors determining the element behaviour in municipal solid waste incinerators*. 1. Field studies. Environ. Sci. Technol. 34(12), 2501-2506. DOI: <https://pubs.acs.org/doi/abs/10.1021/es991078m>
- 3 Benkő, T., Mizsey, P., 2007. *Comparison of flue gas desulphurization processes based on life cycle assessment*. Chemical Engineering 51(2), 19-27. DOI: <https://doi.org/10.3311/pp.ch.2007-2.04>
- 4 Bogush, A., Stegemann, J.A., Wood, I., Roy, A., 2015. *Element composition and mineralogical characterisation of air pollution control residue from UK energy-from-waste facilities*. Waste Management 36, 119-129. DOI: <https://doi.org/10.1016/j.wasman.2014.11.017>
- 5 Carey, P.J., Hills, C.D., Gunning, P.J., 2015. Concrete: innovation and its practical application. The world's first commercially available carbon negative aggregate and its uses. 43<sup>th</sup> annual convention of the Institute of Concrete Technology, 26 March 2015. Available online: <http://www.ukqaa.org.uk/wp-content/uploads/2015/07/Carbon8-submission-for-EN-13055-v2.pdf>
- 6 Chang, J.S., Urashima, K., Tong, Y.X., Liu, W.P., Wei, H.Y., Yang, F.M., Liu, X.J., 2003. Simultaneous removal of NO<sub>x</sub> and SO<sub>2</sub> from coal boiler flue gases by DC corona discharge ammonia radical shower system: pilot plant tests. Journal of Electrostatics 57 (3-4), 313-323. DOI: [10.1016/S0304-3886\(02\)00168-7](https://doi.org/10.1016/S0304-3886(02)00168-7)
- 7 Chin, T., Yan, R., Tee Liang, D., 2005a. Study of the reaction of lime with HCl under simulated flue gas conditions using x-ray diffraction characterization and thermodynamic prediction. Ind. Eng. Chem. Res. 44(23), 8730-8738. DOI: <https://doi.org/10.1021/ie058021v>
- 8 Chin, T., Yan, R., Tee Liang, D., Tay, J.H., 2005b. *Hydrated lime reaction with HCl under simulated flue gas conditions*. Ind. Eng. Chem. Res. 44(10), 3742-3748. DOI: <https://doi.org/10.1021/ie040206z>
- 9 Costa, G., Baciocchi, R., Polettini, A., Pomi, R., Hills, C.D., Carey, P.J., 2007. *Current status and perspectives of accelerated carbonation processes on municipal waste combustion residues*. Environ. Monit. Assess., 135(1-3), 55-75. DOI: [10.1007/s10661-007-9704-4](https://doi.org/10.1007/s10661-007-9704-4)
- 10 De Boom, A., Degrez, M., 2012. *Belgian MSWI fly ashes and APC residues: a characterisation study*. Waste Management 32(6), 1163-1170. DOI: <https://doi.org/10.1016/j.wasman.2011.12.017>
- 11 EU, 2017. Best Available Techniques (BAT) Reference Document for Large Combustion Plants
- 12 Ho, C.S., Shih, S.M., Lee, C.D., 1996. *Influence of CO<sub>2</sub> and O<sub>2</sub> on the reaction of Ca(OH)<sub>2</sub> under spray-drying flue gas desulfurization conditions*. Ind. Eng. Chem. Res. 35(11), 3915-3919. DOI: <https://doi.org/10.1021/ie9600506>
- 13 Karlsson, H.T., Klingspor, J., Bjerle, I., 1981. *Adsorption of hydrochloric acid on solid slaked lime for flue gas clean up*. Journal of the Air Pollution Control Association 31(11), 1177-1180. DOI: <https://doi.org/10.1080/00022470.1981.10465343>
- 14 Lignacite Ltd, 2013. *Carbon Buster Commodity Blocks*. Available online: <http://www.ukqaa.org.uk/wp-content/uploads/2015/07/Carbon8-submission-for-EN-13055-v2.pdf>
- 15 Nygaard, H.G., Kiil, S., Johnsson, J.E., Jensen, J.N., Hansen, J., Fogh, F., Dam-Johansen, K., 2004. *Full-scale measurements of SO<sub>2</sub> gas phase concentrations and slurry compositions in a wet gas desulphurisation spray absorber*. Fuel 83(9), 1151-1164. DOI: <https://doi.org/10.1016/j.fuel.2003.12.007>

- 16 Quina, M.J., Bordado J.C.M., Quinta-Ferreira, R.M., 2011. *Air pollution control in municipal solid waste incinerators*. In The impact of air pollution on health, economy, environment and agricultural sources. Edited by Khallaf M.K., published by IntechOpen, 2011. ISBN 978-953-307-528-0, pages 331-359
- 17 Stein, J., Kind, M., Schlünder, E.U., 2002. *The influence of HCl on SO<sub>2</sub> absorption in the spray dry scrubbing process*. Chemical Engineering Journal 86(1-2), 17-23. DOI: [https://doi.org/10.1016/S1385-8947\(01\)00267-4](https://doi.org/10.1016/S1385-8947(01)00267-4)
- 18 Tan, J., Yang, G., Mao, J., Dai, H., 2014. *Laboratory study on high-temperature adsorption of HCl by dry-injection of Ca(OH)<sub>2</sub> in a dual-layer granular bed filter*. Front. Environ. Sci. Eng. 8(6), 863-870. DOI : <https://doi.org/10.1007/s11783-013-0618-9>
- 19 Wang, L., Jin, Y., Nie, Y., 2010. *Investigation of accelerated and natural carbonation of MSWI fly ash with a high content of Ca*. Journal of Hazardous Materials 174(1-3), 334-343. DOI: <https://doi.org/10.1016/j.jhazmat.2009.09.055>
- 20 Yan, R., Chin, T., Liang, D.T., Laursen, K., Ong, W.Y., Yao, K., Tay, J.H., 2003. *Kinetic study of hydrated lime reaction with HCl*. Environ. Sci. Technol. 37(11), 2556-2562. DOI: <https://doi.org/10.1021/es020902v>
- 21 Zhang, H., Yu, S., Shao, L., He, P., 2019. *Estimating source strengths of HCl and SO<sub>2</sub> emissions in the flue gas from waste incineration*. Journal of Environmental Sciences 75, 370-377. DOI: <https://doi.org/10.1016/j.jes.2018.05.019>

## 12. Lime use in acid mine drainage

- 1 Aubé, B. and Zinck, J., 2003. *Lime treatment of acid mine drainage in Canada*. Brazil-Canada Seminar on Mine Rehabilitation, Florianópolis, Brazil, 1-3 December. Available online: [https://www.researchgate.net/publication/237648554\\_Lime\\_Treatment\\_of\\_Acid\\_Mine\\_Drainage\\_in\\_Canada](https://www.researchgate.net/publication/237648554_Lime_Treatment_of_Acid_Mine_Drainage_in_Canada)
- 2 Basallote, M.D., Cánovas, C.R., Pérez-López, R., Olías M., Macías, F., Nieto, J.M., 2019. Metal partitioning and pH-buffering during mixing processes in an estuary strongly affected by acid mine drainage -The Ria de Huelva estuary (SW Spain). Conference Paper: Proceedings IMWA 2019 Conference - Mine Water: Technological and Ecological Challenges: 409-415, Perm (Russia). Available online: <https://www.imwa.info/imwaconferencesandcongresses/proceedings/306-proceedings-2019.html>
- 3 Casiot, C., Morin, G., Juillot, F., Bruneel, O., Personné, J-C., Leblanc, M., Duquesne, K., Bonnefoy, V., Elbez-Poulitchet, F., 2003. *Bacterial immobilization and oxidation of arsenic in acid mine drainage (Carnoulès creek, France)*. Water Research 37(12), 2929-2936. DOI:10.1016/S0043-1354(03)00080-0
- 4 Coulton, R., Bullen, C., Williams, C., Williams, K., 2004. *The formation of high density sludge from minewater with low iron concentrations*. Proceedings of Mine Water Process, Policy and Progress, Newcastle upon Tyne, UK, pages 145-153
- 5 Heviánková, S., Bestová, I., Kyncl, M., Šimková, L., Zechner, M., 2013. *Calcium carbonate as an agent in acid mine water neutralisation*. Inżynieria Mineralna 14(2), 159-166. Available online: [http://www.potopk.com.pl/Full\\_text/2013\\_full/2013\\_2\\_29.pdf](http://www.potopk.com.pl/Full_text/2013_full/2013_2_29.pdf)
- 6 Kaur, G., Couperthwaite, S.J., Hatton-Jones, B.W., Millar, G.J., 2018. *Alternative neutralisation materials for acid mine drainage treatment*. Journal of Water Process Engineering 22, 46-58. DOI: <https://doi.org/10.1016/j.jwpe.2018.01.004>
- 7 Moodley, I., Sheridan, C.M., Kappelmeyer, U., Akcil, A., 2018. *Environmentally sustainable acid mine drainage remediation: Research developments with a focus on waste/by-products*. Minerals Engineering 126, 207-220. DOI: <http://dx.doi.org/10.1016/j.mineng.2017.08.008>
- 8 Sahoo, P.K., Kim, K., Equeenuddin, S.M., Powell, M.A., 2013. *Current Approaches for mitigating acid mine drainage*. Reviews of environmental contamination and toxicology, 226, 1-32. DOI: 10.1007/978-1-4614-6898-1\_1

### 13. Lime use in agriculture

- 1 Australian Minister for the Environment and Energy, Josh Frydenberg, 2018b. Explanatory statement - Carbon Credits (Carbon Farming Initiative - Measurement of Soil Carbon Sequestration in Agricultural Systems) Methodology Determination 2018. Authorised Version registered to F2018L0089 in 07/02/2018.  
Available online:  
<https://www.legislation.gov.au/Details/F2018L00089/Explanatory%20Statement/Text>
- 2 Blume, H-P., Brümmer, G.W., Horn, R., Scheffer, F., Kandeler, E., Knabner, IK, Kretzschmar, R., Stahr, K., Wilke, B-M., 2009. *Scheffer/Schachtschabel: Lehrbuch der Bodenkunde*. Spektrum Akademischer Verlag. ISBN: 9783827422514
- 3 Borken, W. and Brumme, R., 1997. *Liming practice in temperate forest ecosystems and the effects on CO<sub>2</sub>, N<sub>2</sub>O and CH<sub>4</sub> fluxes*. Soil Use and Management 13 (s4), 251-257. DOI: <https://doi.org/10.1111/j.1475-2743.1997.tb00596.x>
- 4 Brady, N.C., 1969. *Chapter 15: lime and its soil-plant relationships*. In: the nature and properties of soils, 7<sup>th</sup> edition. MCMILLAN CO. ISBN-10: 0023165200
- 5 Brumme, R., and Beese, F., 1992. *Effects of liming and nitrogen fertilization on emissions of CO<sub>2</sub> and N<sub>2</sub>O from a temperate forest*. Journal of geophysical research 97 (D12), 12851-12858. DOI: <https://doi.org/10.1029/92JD01217>
- 6 CEN - European Committee for Standardization, 2006. *Liming materials - Determination of the lime requirement - Guidelines, principles, and parameters*. Management Centre: rue de Stassart, 36 Brussels.
- 7 Chan, K.Y., Conyers, M.K., Scott, B., 2007. *Improved structural stability of an acidic hardsetting soil attributable to lime application*. Communications in soil science and plant analysis 38 (15), 2163-2175. DOI: 10.1080/00103620701549108
- 8 Department for Environment, Food & Rural Affairs - DEFRA, 2016. *The British survey of fertiliser practice - fertiliser use on farm crops for crop year 2015*. ISBN 978-0-99297-351-3. Available online: [https://assets.publishing.service.gov.uk/government/uploads/system/uploads/attachment\\_data/file/516111/fertiliseruse-report2015-14apr16.pdf](https://assets.publishing.service.gov.uk/government/uploads/system/uploads/attachment_data/file/516111/fertiliseruse-report2015-14apr16.pdf)
- 9 EC - European Commission, 2013. Commission Regulation (EU) No 463/2013 of 17 May 2013 amending Regulation (EC) No 2003/2003 of the European Parliament and of the Council relating to fertilisers for the purposes of adapting Annexes I, II and IV thereto to technical progress. Official Journal of the European Union L134, pp: 1-14. Available online: <https://eur-lex.europa.eu/legal-content/EN/TXT/?uri=CELEX:32013R0463>
- 10 EC - European Commission, 2016. Circular Economy Package - Proposal for a regulation of the European Parliament and of the Council laying down rules on the making available on the market of CE marked fertilising products and amending Regulations (EC) No 1069/2009 and (EC) No 1107/2009. SWD (2016) 65 final, Brussels, 17.03.2016. Available online: <https://ec.europa.eu/transparency/regdoc/rep/10102/2016/EN/SWD-2016-64-F1-EN-MAIN-PART-1.PDF>
- 11 Eichinger, M.M. and Eckmüllner, O., 2012. 60 Jahre Waldbodenkalkung im Habsburg-Lothringen'schen Gut Persenbeug. Eine ökonomische und ökologische Auswertung (60 years forest soil liming in Habsburg Lorreine Gut Persenbeug. An economic and ecological evaluation). Performed by Höhere Lehranstalt für Umwelt und Wirtschaft des Zisterzienserstiftes Zwettl.  
Available online:  
[http://cms.hluwyspताल.ac.at/hluwweb/images/Downloads/Umweltlabor/20120606\\_finale\\_waldkalkungsbroschuere.pdf](http://cms.hluwyspताल.ac.at/hluwweb/images/Downloads/Umweltlabor/20120606_finale_waldkalkungsbroschuere.pdf)
- 12 eip-agri - agriculture & innovation, 2019. *Focus Group Moving from source to sink in arable farming. Final report June 2019*. Focus Group funded by the European Commission.  
Available online: <https://ec.europa.eu/eip/agriculture/en/publications/eip-agri-focus-group-moving-source-sink-arable>
- 13 Fornara, D.A., Steinbeiss, S., McNamara, N.P., Gleixner, G., Oakley, S., Poulton, P.R., Macdonald, A.J., Bardgett, R.D., 2011. Increases in soil organic carbon sequestration can reduce the global



- warming potential of long-term liming to permanent grassland. *Global Change Biology* 17 (5), 1925-1934. DOI: [10.1111/j.1365-2486.2010.02328.x](https://doi.org/10.1111/j.1365-2486.2010.02328.x)
- 14 Goulding, K.W.T., 2016. *Soil acidification and the importance of liming agricultural soils with particular reference to the United Kingdom*. *Soil Use Management* 32 (3), 390-399. DOI: [10.1111/sum.12270](https://doi.org/10.1111/sum.12270)
  - 15 Grieve, I.C., Davidson, D.A., Bruneau, P.M.C., 2005. *Effects of liming on void space and aggregation in an upland grassland soil*. *Geoderma* 125 (1-2), 39-48. DOI: <https://doi.org/10.1016/j.geoderma.2004.06.004>
  - 16 Han, Z., Zhang, X., Qiao, Y., Wang, L., 2011. *Alkaline ameliorants increase nitrous oxide emission from acidified black soil in northeastern China*. *Journal of Environmental Sciences* 23 (Supplement), S45-S48. DOI: [https://doi.org/10.1016/S1001-0742\(11\)61075-9](https://doi.org/10.1016/S1001-0742(11)61075-9)
  - 17 Havlin, J.L., Tisdale, S.L., Nelson, W.L., Beaton, J.D., 2013. *Soil fertility and Fertilizers: an introduction to nutrient management*, 8<sup>th</sup> edition. Publisher: Pearson, ISBN-10: 9780135033739
  - 18 Haynes, R.J. and Naidu, R., 1998. *Influence of lime, fertilizer and manure applications on soil organic matter content and soil physical conditions: a review*. *Nutrient Cycling in Agroecosystems* 51, 123-137. DOI: <https://link.springer.com/content/pdf/10.1023%2FA%3A1009738307837.pdf>
  - 19 Hénault, C., Bourennane, H., Ayzac, A. et al. Management of soil pH promotes nitrous oxide reduction and thus mitigates soil emissions of this greenhouse gas. *Sci Rep* 9, 20182 (2019). <https://doi.org/10.1038/s41598-019-56694-3>
  - 20 Holland, J.E., Bennett, A.E., Newton, A.C., White, P.J., McKenzie, B.M., George, T.S., Pakeman, R.J., Bailey, J.S., Fornara, D.A., Hayes, R.C., 2018. *Liming impacts on soils, crops and biodiversity in the UK: A review*. *Science of the Total Environment* 610-611, 316-332. DOI: <https://doi.org/10.1016/j.scitotenv.2017.08.020>
  - 21 Lal, R., 2004. *Soil carbon sequestration impacts on global climate change and food security*. *Science* 304 (5677), 1623-1627. DOI: 10.1126/science.1097396
  - 22 Lal, R., 2009. *Sequestering atmospheric carbon dioxide*. *Critical reviews in Plant Science* 28(3), 90-96. DOI: <https://www.tandfonline.com/doi/pdf/10.1080/07352680902782711?needAccess=true>
  - 23 Lefèvre, C., Fatma, R., Viridiana, A., Liesl, W., 2017. *Soil organic carbon, the hidden potential*. Food and Agriculture Organization of the United Nations, Rome (Italy). ISBN 978-92-5-109681-9
  - 24 Lugato, E., Leip, A., Jones, A., 2018. *Mitigation potential of soil carbon management overestimated by neglecting N<sub>2</sub>O emissions*. *Nature Climate Change* 8(3), 219-223. DOI: 10.1038/s41558-018-0087-z
  - 25 Mijangos, I., Albizu, I., Epelde, L., Amezcaga, I., Mendarte, S., Garbisu, C., 2010. *Effects of liming on soil properties and plant performance of temperate mountainous grasslands*. *Journal of Environmental Management* 91 (10), 2066-2074. DOI: 10.1016/j.jenvman.2010.05.011
  - 26 Mullins, G.L., Alley, M.M., Wysor, W.G., Phillips, S.B., 2009. *Sources of lime for acid soils in Virginia*. Publication 452-510, produced by Communications and Marketing, College of Agriculture and Life Sciences, Virginia Polytechnic Institute and State University. Available online: [https://www.researchgate.net/publication/242590369\\_Sources\\_of\\_Lime\\_for\\_Acid\\_Soils\\_in\\_Virginia](https://www.researchgate.net/publication/242590369_Sources_of_Lime_for_Acid_Soils_in_Virginia)
  - 27 Nilsson, S.I., Andersson, S., Valeur, I., Persson, T., Bergholm, J., Wirén, A., 2001. *Influence of dolomite lime on leaching and storage of C, N, and S in a Spodosol under Norway spruce (Picea abies (L.) Karst.)*. *Forest Ecology and Management* 146 (1-3), 55-73. DOI: 10.1016/S0378-1127(00)00452-7
  - 28 Persson, T., Rudebeck, A., Wirén, A., 1995. *Pools and fluxes of carbon and nitrogen in 40-year-old forest liming experiments in Southern Sweden*. *Water, Air, and Soil Pollution*, 85(2), 901-906. DOI: <https://doi.org/10.1007/BF00476944>
  - 29 Poulton, P.R., Pye, E., Hargreaves, P.R., Jenkinson, D.S., 2003. *Accumulation of carbon and nitrogen by old arable land reverting to woodland*. *Global Change Biology* 9 (6), 942-955. DOI: <https://doi.org/10.1046/j.1365-2486.2003.00633.x>
  - 30 Professional Agricultural Analysis Group - PAAG, 2015. *Collection of data from routine soil analysis in the UK*. Available online: <http://www.nutrientmanagement.org/>



- 31 Šimek, M., Hopkins, D.W., Kalčík, J., Pícek, T., Šantrůčková, H., Staňa, J., Trávník, K., 1999. *Biological and chemical properties of arable soils affected by long-term organic and inorganic fertilizer applications*. *Biology and Fertility of Soils* 29 (3), 300-308. DOI: <https://doi.org/10.1007/s003740050556>
- 32 Šrámek, V., Fadrhonsová, V., Vortelová, L., Lomský, B., 2012. *Development of chemical soil properties in the western Ore Mts. (Czech Republic) 10 years after liming*. *Journal of Forest Science* 58 (2): 57-66. DOI: 10.17221/72/2011-JFS
- 33 Stolbovoy, V., Montanarella, L., Filippi, N., Selvaradjou, S-K, Panagos, P., Gallego, J., 2005. *Soil sampling protocol to certify the changes of organic carbon stock in mineral soils of European Union*. European Commission-JRC.  
Available online:  
<http://publications.jrc.ec.europa.eu/repository/bitstream/JRC32323/EUR21576.pdf>
- 34 Unicalce S.p.A., 2019. *Calculation tool for liming requirement*. Available online: <https://www.unicalce.it/en/calculation-tool/>
- 35 Von Uexküll, H.R. and Mutert, E., 1995. *Global extent, development and economic impact of acid soil*. *Plant and Soil* 171 (1), 1-15. Available online: <https://www.jstor.org/stable/42947399>
- 36 Wellbrock, N., Bolte, A., Flessa, H., 2016. *Dynamik und räumliche Muster forstlicher Standorte in Deutschland: Ergebnisse der Boden-zustandserhebung im Wald 2006 bis 2008*. Braunschweig: Johann Heinrich von Thünen-Institut, Thünen Report 43. DOI: 10.3220/REP1473930232000

## 14. Lime use in calcium carbide

All references on this application are in Supplementary material 1

## 15. Lime use in base and precious metals, lithium

- 1 Acma, E., Sesigur, H., Addemir, O., Tekin, A., 1997. *Processing of Küre (Turkey) copper slag for the recovery of copper and cobalt and the production of gamma Fe<sub>2</sub>O<sub>3</sub>*. *Trans. Indian. Inst. Met.* 50, 147-151 (via Gorai et al., 2003)
- 2 Ahmari, S., Parameswaran, K., Zhang, L., 2015. Alkali activation of copper mine tailings and low-calcium flash-furnace copper smelter slag. *J. Mater. Civ. Eng.* 27(6), 04012193
- 3 Al-Jabri, K.S., Al-Saidy, A.H., Taha, R., 2011. *Effect of copper slag as a fine aggregate on the properties of cement mortars and concrete*. *Construction and Building Materials* 25(2), 933-938. DOI: <https://doi.org/10.1016/j.conbuildmat.2010.06.090>
- 4 Ayano, T. and Sakata, K., 2000. *Durability of concrete with copper slag fine aggregate*. *Proceeding of the fifth CANMET/ACI International Conference on durability concrete*, SP 192, 141-158 (via Shi et al., 2008)
- 5 Benvenuti, M., Mascaro, I., Corsini, F., Lattanzi, P., Parrini, P., Tanelli, G., 1997. *Mine waste dumps and heavy metal pollution in abandoned mining district of Boccheggiano (Southern Tuscany, Italy)*. *Environ. Geol.* 30(3-4), 238-243. DOI: <https://doi.org/10.1007/s002540050152>
- 6 Breuer, P., Sutcliffe, C., Meakin, R., 2010. *Comparison of industrial cyanide destruction processes*. *Proceedings of the XXV International Mineral Processing congress*, Brisbane, Australia, 6-10 September 2010
- 7 Bridge, B., 2000. The social regulation of resource access and environmental impact: production, nature and contradiction in the US copper industry. *Geoforum* 31(2), 237-256. DOI: [https://doi.org/10.1016/S0016-7185\(99\)00046-9](https://doi.org/10.1016/S0016-7185(99)00046-9)
- 8 Brindha, D. and Nagan, S., 2011. *Durability studies on copper slag admixed concrete*. *Asian Journal of Civil Engineering* 12(5), 563-578
- 9 Bruckard, W.J., Sparrow, G.J., Woodcock, J.T., 2011. *A review of the effects of the grinding environment on the flotation of copper sulphides*. *International Journal of Mineral processing* 100(1-2), 1-13. DOI: <https://doi.org/10.1016/j.minpro.2011.04.001>

- 10 Busè, R., Mombelli, D., Mapelli, C., 2014. *Recupero dei metalli dalle polveri di aspirazione dei forni: processo Waelz* (In Italian). La metallurgia italiana 5, 19-27. Available online: <https://docplayer.it/10729346-Recupero-dei-metalli-dalle-polveri-di-aspirazione-dei-forni-processo-waelz.html>
- 11 Chen, A., Peng, Z., Hwang, J.Y., Ma, Y., Liu, X., Chen, X., 2015. *Recovery of silver and gold from copper anode slimes*. JOM 67(2), 493-502. DOI: <https://doi.org/10.1007/s11837-014-1114-9>
- 12 Cole, S. and Joe Ferron, C., 2002. *A review of the beneficiation and extractive metallurgy of the Platinum Group Elements, highlighting recent process innovation*. SGS Mineral Services Technical paper 2002-3. Available online: <https://www.sgs-group.com.bd/-/media/global/documents/technical-documents/sgs-technical-papers/sgs-min-tp2002-03-beneficiation-and-extractive-metallurgy-of-pge.pdf>
- 13 Collins, R.J. and Ciesielski, S.K., 1994. *Recycling and use of waste materials and by-products in highway construction*. National Cooperative Highway Research Programme, Synthesis of highway practice 199. Transportation Research Board, Washington.
- 14 Das, M. and Maiti, S.K., 2008. *Comparison between availability of heavy metals in dry and wetland tailing of an abandoned copper tailing pond*. Environ. Monit. Assess. 137(1-3), 343-350. DOI: <https://doi.org/10.1007/s10661-007-9769-0>
- 15 Deja, J. and Malolepszy, J., 1994. *Long-term resistance of alkali activated slag mortars to chloride solution*. Proceedings of the third CANMET/ACI International Conference of durability of concrete, 657-671 (via Shi et al., 2008)
- 16 Dreisinger, D., 2006. *Copper leaching from primary sulphides: options for biological and chemical extraction of copper*. Hydrometallurgy 83(1-4), 10-20. DOI: <https://doi.org/10.1016/j.hydromet.2006.03.032>
- 17 Ettler, V., Piantone, P., Touray, J.C., 2003. Mineralogical control on inorganic contaminant mobility in leachate from lead-zinc metallurgical slag: experimental approach and long-term assessment. Mineral. Mag. 67(6), 1269-1283. DOI: <https://doi.org/10.1180/0026461036760164>
- 18 EU, 2009. *Best Available Techniques (BAT) Reference Document for Management of Tailings and Waste-Rock in Mining Activities*. Available online: [https://eippcb.jrc.ec.europa.eu/reference/BREF/mmr\\_adopted\\_0109.pdf](https://eippcb.jrc.ec.europa.eu/reference/BREF/mmr_adopted_0109.pdf)
- 19 EU, 2017. *Best Available Techniques (BAT) Reference Document for the Non-Ferrous Metals Industries*. Available online: <https://eippcb.jrc.ec.europa.eu/reference/nfm.html>
- 20 Fang, Y., Gu, Y., Kang, Q., Wen, Q., Dai, P., 2011. *Utilization of copper tailing for autoclaved sand-lime brick*. Construction and Building Materials 25(2), 867-872. DOI: <https://doi.org/10.1016/j.conbuildmat.2010.06.100>
- 21 Fu, K., Chen, S., Wang, Z., Xiao, J., Luo, D., 2015. *Lime-assisted cyanide leaching of refractory gold ores from Ajialongwa mine*. Proceedings of the 11<sup>th</sup> International Congress for Applied Mineralogy (ICAM), 107-113. DOI: [https://doi.org/10.1007/978-3-319-13948-7\\_12](https://doi.org/10.1007/978-3-319-13948-7_12)
- 22 Garrett, D.E., 2004. *Handbook of lithium and natural calcium chloride: their deposits, processing, uses and properties*. 1<sup>st</sup> edition, Elsevier, Amsterdam, The Netherlands
- 23 Gokcekus, H., Kabdasli, S., Kabdasli, I., Turker, U., Tunay, O., Olmez, T., 2003. *Pollution of coastal region impacted by acid mine drainage in Morphou Bay, Northern Cyprus*. J. Environ. Sci. Health. 38(8), 1445-1457. DOI: <https://doi.org/10.1081/ESE-120021469>
- 24 Gorai, B., Jana, R.K., Premchand, 2003. *Characteristics and utilization of copper slag. A review*. Resources, Conservation and Recycling 39(4), 299-313. DOI: [https://doi.org/10.1016/S0921-3449\(02\)00171-4](https://doi.org/10.1016/S0921-3449(02)00171-4)
- 25 Gordon, R.B., 2002. *Production residues in copper technological cycles*. Resour. Conserv. Recycl. 36(2), 87-106. DOI: [https://doi.org/10.1016/S0921-3449\(02\)00019-8](https://doi.org/10.1016/S0921-3449(02)00019-8)

- 26 Hansen, H.K., Rojo, A., Ottossen, L.M., 2007. *Electrokinetic remediation of copper mine tailings: implementing bipolar electrodes*. *Electrochimica Acta* 52(10), 3355-3359. DOI: <https://doi.org/10.1016/j.electacta.2006.02.069>
- 27 Hewitt, D., Breuer, P., Jeffery, C., 2012. *Cyanide detoxification of cyanidation tails and processes streams*. <https://publications.csiro.au/rpr/download?pid=csiro:EP123765&dsid=DS3> (latest access 7-6-2019)
- 28 Huang, K., 2001. *Use of copper slag in cement production*. *Sichan Cement* 4, 25-27 (via Shi et al., 2008)
- 29 Hwang, C.L. and Laiw, J.C., 1989. *Properties of concrete using copper slag as a substitute for fine aggregate*. *Proceeding of the 3<sup>rd</sup> International Conference on fly ash, silica fume, slag and natural pozzolans in concrete*. SP 114-82, 1677-1695
- 30 Jandová, J., Dvořák, P., Vu, H.N., 2010. *Processing of zinnwaldite waste to obtain Li<sub>2</sub>CO<sub>3</sub>*. *Hydrometallurgy* 103(1-4), 12-18. DOI: <https://doi.org/10.1016/j.hydromet.2010.02.010>
- 31 Johnson, R.H., Blowes, D.W., Robertson, W.D., Jambor, J.L., 2000. *The hydrogeochemistry of the nickel Rim mine tailings impoundment, Sudbury, Ontario*. *Journal of Contaminant Hydrology* 41(1-2), 49-80. DOI: [https://doi.org/10.1016/S0169-7722\(99\)00068-6](https://doi.org/10.1016/S0169-7722(99)00068-6)
- 32 Jones, R.T., 2005. *An overview of Southern African PGM smelting*. *Proceedings of the 44<sup>th</sup> annual Conference of Metallurgists, Calgary, Alberta, Canada, 21-24 August 2005*, 147-178. Available online: <https://www.mintek.co.za/Pyromet/Files/2005JonesPGMsmelting.pdf>
- 33 Karam, A., Khiari, L., Jaouich, A., 2009. *Influence on tailing pH on the sorption of copper by sulphide mine tailing*. *Journal of Arid Land Studies* 19, 233-236. DOI: <https://pdfs.semanticscholar.org/4554/9ac384a4112ecfcb199e6da72a1addab748f.pdf>
- 34 Khanzadi, M. and Behnood, A., 2009. *Mechanical properties of high-strength concrete incorporating copper slag as coarse aggregate*. *Construction and Building Materials* 23(6), 2183-2188. DOI: <https://doi.org/10.1016/j.conbuildmat.2008.12.005>
- 35 Kiyak, B., Özer, A., Altunğdan, S.H., Erdem, M., Tümen, F., 1999. *Cr(VI) reduction in aqueous solution by using copper smelter slag*. *Waste Manage* 19(5), 333-338. DOI: [https://doi.org/10.1016/S0956-053X\(99\)00141-5](https://doi.org/10.1016/S0956-053X(99)00141-5)
- 36 Koichi, Y., Koji, O., Akira, A., Tsuru, M., 2012. *Separation and recovery of valuables from used lithium ion batteries*. *Japan Patent, JP 2012229481A* (via Hu et al., 2017)
- 37 Kondas, J. and Jandova, J., 2006. *Lithium extraction from zinnwaldite waste after gravity dressing of Sn-W ores*. *Acta Metall. Slovaca* 12, 192-202.
- 38 Kreusch, M.A., Ponte, M.J.J.S., Ponte, H.A., Kaminari, N.M.S., Marino, C.E.B., Mymrin, V., 2007. *Technological improvements in automotive battery recycling*. *Resour. Conserv. Recycl.* 52(2), 368-380. DOI: <https://doi.org/10.1016/j.resconrec.2007.05.004>
- 39 Marghussian, V.K. and Maghsoodipoor, A., 1999. *Fabrication of unglazed floor tiles containing Iranian copper slags*. *Ceramics International* 25(7), 617-622. DOI: [https://doi.org/10.1016/S0272-8842\(98\)00075-3](https://doi.org/10.1016/S0272-8842(98)00075-3)
- 40 Mombelli, D., Mapelli, C., Barella, S., Gruttadauria, A., Di Landro, U., 2015. *Laboratory investigation of Waelz slag stabilization*. *Process Safety and Environmental Protection* 94, 227-238. DOI: <https://doi.org/10.1016/j.psep.2014.06.015>
- 41 Mpinga, C.N., Eksteen, J.J., Aldrich, C., Dyer, L., 2015. *Direct leach approaches to Platinum Group Metal (PGM) ores and concentrates: a review*. *Minerals Engineering* 78, 93-113. DOI: <https://doi.org/10.1016/j.mineng.2015.04.015>
- 42 Norgate, T. and Jahanshahi, S., 2011. *Assessing the energy and greenhouse gas footprints of nickel laterite processing*. *Mineral Engineering*, 24, 698-707. DOI: [10.1016/j.mineng.2010.10.002](https://doi.org/10.1016/j.mineng.2010.10.002)
- 43 Onuaguluchi, O., Eren, Ö., 2012a. *Recycling of copper tailings as an additive in cement mortars*. *Construction and Building Materials* 37, 723-727. DOI: <https://doi.org/10.1016/j.conbuildmat.2012.08.009>

- 44 Onuaguluchi, O. and Eren, Ö., 2012b. *Cement mixture containing copper tailings as an additive: durability properties*. Materials Research 15(6), 1029-1036. DOI: <http://dx.doi.org/10.1590/S1516-14392012005000129>
- 45 Panda, R., Jha, M.K., Pathak, D.D., 2018. *Commercial processes for the extraction of Platinum Group Metals (PGMs)*. In book: Rare metal technology. DOI: 10.1007/978-3-319-72350-1\_11
- 46 Parkinson, G., 1999. *Leaching metal...for all it's worth*. Chemical Engineering, 28-31 November (via Norgate and Jahanshahi, 2011)
- 47 Parsons, M.B., Bird, D.K., Einaudi, M.T., Alpers, C.N., 2001. *Geochemical and mineralogical controls on trace element release from the Penn Mine base-metal slag dump, California*. Applied Geochemistry 16(14), 1567-1593. DOI: <https://pubs.er.usgs.gov/publication/70022965>
- 48 Potysz, A., Kierczak, J., Fuchs, Y., Grybos, M., Guibaud, G., Lens, P.N.L., van Hullebusch, E.D., 2016. *Characterization and pH-dependent leaching behaviour of historical and modern copper slags*. Journal of Geochemical Exploration 160, 1-15. DOI: <https://doi.org/10.1016/j.gexplo.2015.09.017>
- 49 Premchand et al., 2000. *Characterisation and utilisation of copper slag of Sterlite Industries India Ltd*. Report submitted to SIIL Tuticorin, India: National Metallurgical Laboratory CSIR, October 2000 (via Gorai et al., 2003)
- 50 Qiu, Y., Wu, D., Yan, L., Zhou, Y., 2016. *Recycling of spodumene slag: preparation of green polymer composites*. RSC Adv. 6, 36942-36953. DOI: 10.1039/c6ra03119f
- 51 Riveros, P.A., Dutrizac, J.E., Spencer, P., 2001. *Arsenic disposal practices in the metallurgical industry*. Canadian Metallurgical Quarterly 40(4), 395-420. DOI: <https://doi.org/10.1179/cm.2001.40.4.395>
- 52 Siame, E. and Pascoe, R.D., 2011. *Extraction of lithium from micaceous waste from China clay production*. Miner. Eng. 24(14), 1595-1602. DOI: <https://doi.org/10.1016/j.mineng.2011.08.013>
- 53 Shan, C., Wang, J., Zheng, J., Yu, Y., 2012. Study on application of nickel slag in cement concrete. Bull. Chin. Ceram.Soc. 31, 1263-1268 (via Yang et al., 2017)
- 54 Shi, C., Qian, J., 2000. *High performance cementing materials from industrial slags. A review*. Resources, Conservation and Recycling 29(3), 195-207. DOI: [https://doi.org/10.1016/S0921-3449\(99\)00060-9](https://doi.org/10.1016/S0921-3449(99)00060-9)
- 55 Somerville, M., Chen, C., Alvear, G.R.F., Nikolic, S., 2016. *Fluxing strategies for the direct to blister smelting of high silica and low iron copper concentrates*. Proceedings of the 10<sup>th</sup> International Conference on Molten Slags, Fluxes and Salts (Molten16), 667-675
- 56 Taskinen, P., 2010. *Direct-to-blister smelting of copper concentrates: the fluxing chemistry*. Proceedings of the seethataman seminar, Material processing towards properties, Sigtuna (Sweden), 14-15 June 2010 (Via Taskinen, 2011)
- 57 Taskinen, P., 2011. *Direct-to-blister smelting of copper concentrates: the slag fluxing chemistry*. Mineral Processing and Extractive Metallurgy 120(4), 240-246. DOI: <https://doi.org/10.1179/1743285511Y.0000000013>
- 58 Thomas, B.S., Damare, A., Gupta, R.C., 2013. *Strength and durability characteristics of copper tailing concrete*. Construction and Building Materials 48, 894-900. DOI: <https://doi.org/10.1016/j.conbuildmat.2013.07.075>
- 59 Vyas, M.H., Sanghavi, J.R., Seshadri, K., 1975. *Lithium extraction from Indian lepidolite ores*. Res. Ind. 20, 68-70
- 60 Wang, G. and Thompson, R., 2011. *Slag use in high-way construction. The philosophy and technology of its utilization*. International Journal of Pavement Research and Technology 4(2), 97-103. DOI: [http://www.ijprt.org.tw/mailweb/files/sample/V4N2\\_97-103.pdf](http://www.ijprt.org.tw/mailweb/files/sample/V4N2_97-103.pdf)
- 61 Warner, A., Diaz, C., Dalvi, A., Mackey, P., Tarasov, A., 2006. *JOM word nonferrous smelter survey, part III: nickel: laterite*. Journal of Metals, 58(4), 11-20. DOI: <https://doi.org/10.1007/s11837-006-0209-3>
- 62 Wong, J.W.C., Ip, C.M., Wong, M.H., 1998. Acid-forming capacity of lead-zinc mine tailings and its implications for mine rehabilitation. Environmental Geochemistry and Health 20, 149-155

- 63 Wong, W.L.E., Arun, S.M., 2009. *Gold extraction and recovery process*. Internal report, M3TC, National University of Singapore. Available online:  
64 <https://pdfs.semanticscholar.org/7559/67e38c3b788c9d41aaedec4f3d5ebd921855.pdf>
- 65 Xiao, M.S., Wang, S.H., Zhang, Q.F., Zhang, J.W., 1997. Leaching mechanism of the spodumene sulphuric acid process. *Rare Met.* 1, 37-45 (via Yiren et al., 2019)
- 66 Yin, G., Li, G., Wei, Z., Wan, L., Shui, G., Jing, X., 2011. *Stability analysis of a copper tailings dam via laboratory model tests: a Chinese case study*. *Mineral Engineering* 24(2), 122-130. DOI: <https://doi.org/10.1016/j.mineng.2010.10.014>
- 67 Yucel, O., Sahin, F.C., Sirin, B., Addemir, O., 1999. *A reduction study of copper slag in a DC arc furnace*. *Scand. J. Metal.* 28, 93-99 (via Gorai et al., 2003)
- 68 Yukselen, M.A., 2002. Characterization of heavy metal contaminated soils in Northern Cyprus. *Environ. Geol.* 42, 503-597 (Via Onuaguluchi and Eren, 2012a)
- 69 Zainol, Z. and Nicol, M.J., 2009. *Comparative study of chelating ion exchange resins for the recovery of nickel and cobalt from laterite leach tailings*. *Hydrometallurgy* 96(4), 283-287. DOI: <https://doi.org/10.1016/j.hydromet.2008.11.005>
- 70 Zhao, F., Zhao, J., Liu, H., 2009. *Autoclaved brick from low silicon tailings*. *Constr. Build. Mater.* 23(1), 538-541. DOI: <https://doi.org/10.1016/j.conbuildmat.2007.10.013>

## 16. Lime use in titanium dioxide production – red gypsum

- 1 Barksdale, J., 1961. *Titanium, its occurrence, chemistry and technology*. 2<sup>nd</sup> edition, the Roland Press Company, New York (via Gazquez et al., 2014)
- 2 EU, 2007. Reference document on Best Available Techniques for the Manufacture of Large volume inorganic chemicals-solids and other industry. [http://eippcb.jrc.ec.europa.eu/reference/BREF/lvics\\_bref\\_0907.pdf](http://eippcb.jrc.ec.europa.eu/reference/BREF/lvics_bref_0907.pdf) (latest access 11-3-2019)
- 3 Fauziah, C.I., Nur Hanani, M., Zauyah, S., Samsuri, A.W., Rosazlin, A., 2011. *Co-application of red gypsum and sewage sludge on acidic tropical soils*. *Communications in soil science and plant analysis* 42(21), 2561-2571. DOI: <https://doi.org/10.1080/00103624.2011.61403>
- 4 Gázquez, M.J., Bolívar, J.P., Garcia-Tenorio, R., Vaca, F., 2014. *A review of the production cycle of titanium dioxide pigment*. *Materials Sciences and Applications* 5, 441-458. DOI: <http://dx.doi.org/10.4236/msa.2014.57048>
- 5 Grzmil, B.U., Grela, D., Kic, B., 2008. *Hydrolysis of titanium sulphate compounds*. *Chemicals papers* 62(1), 18-25. DOI: 10.2478/s11696-007-0074-8
- 6 Huntsman Tioxide, 2011. Relazione tecnica allegata alla richiesta di autorizzazione alla costruzione e gestione di un reattore sperimentale finalizzato alla verifica della fattibilità dell'uso dei gessi rossi provenienti dalla produzione di TiO<sub>2</sub> come materiale per la copertura definitiva di discariche di RS non pericolosi. Available online (In Italian): <http://www.lavoroambienteesalute.it/wp-content/uploads/2011/07/Relazione-Tecnica-Feb-2011.pdf> (latest access 11-3-2019)

## 17. Lime use in aluminium production – red mud

- 1 Alcoa, 2013. *Long-term residue management strategy. Kwinana 2013 Partial Report*. [https://www.alcoa.com/australia/en/pdf/kwinana\\_refinery\\_ltrms\\_report\\_2013PR.pdf](https://www.alcoa.com/australia/en/pdf/kwinana_refinery_ltrms_report_2013PR.pdf) (latest access 28-2-2019)
- 2 Bánvölgyi, G., 2015. *Opportunities within the alumina refineries to make bauxite residue easy to downstream use*. Bauxite residue valorisation and best practices conference, Leuven 5-7/10/2015. Available online: <http://conference2015.redmud.org/wp-content/uploads/2015/10/Gy%C3%B6rgy-George-B%C3%81NV%C3%96LGYI-secure.pdf>



- 3 Bott, R., Langeloh, T., Hahn, J., 2005. *Re-usage of dry bauxite residue*. Proceedings of the 7<sup>th</sup> International Alumina Quality Workshop. AQW Ltd, Perth, Australia, 236-241 (via Clark et al., 2015)
- 4 Brunori, C., Cremisini, C., Massanisso, P., Pinto, V., Torricelli, L., 2005. *Reuse of a treated red bauxite waste: studies on environmental compatibility*. J. Hazard. Mater. 117(1), 55-63. DOI: 10.1016/j.jhazmat.2004.09.010
- 5 Collazo, A., Cristóbal, M.J., Nóvoa, X.R., Pena, G., Pérez, M.C., 2006. Electrochemical impedance spectroscopy as a tool for studying steel corrosion inhibition in simulated concrete environments- red mud used as rebar corrosion inhibitor. Journal of ASTM International 3(2), 1-10. DOI: <https://doi.org/10.1520/JAI11785>
- 6 Cooling, D.J., Jamieson, E., 2004. *Bauxite Residues - A High Volume Resource*. Paper of the Conference Green Processing, At Perth, Australia, Volume: 225-228
- 7 Cooling, D.J., 2007. Improving the sustainability of residue management practices. Alcoa World Alumina Australia. PASTE 2007, *Proceedings of the 10th International Seminar on Paste and Thickened Tailings, Perth, Australia*
- 8 Diane, M.S., 1997. Étude comparative des boues rouges de l'usine d'alumine de Friguia (Guinée) et des déchets de bauxite de la British Aluminium Company d'Awaso (Ghana). Bulletin des laboratoires des Ponts et Chaussées 211, 33-39. Available online: [https://www.ifsttar.fr/collections/BLPCpdfs/blpc\\_211\\_33-39.pdf](https://www.ifsttar.fr/collections/BLPCpdfs/blpc_211_33-39.pdf)
- 9 European Aluminium Association - EAA, 2014. *Bauxite residue management: best practice*. [http://www.world-aluminium.org/media/filer\\_public/2014/09/03/bauxite\\_residue\\_management\\_-\\_best\\_practice.pdf](http://www.world-aluminium.org/media/filer_public/2014/09/03/bauxite_residue_management_-_best_practice.pdf) (latest access 28-2-2019)
- 10 Enick, R.M., Beckman, E.J., Shi, C., Xu, J., Chordia, L., 2001. *Remediation of metal-bearing aqueous waste streams via direct carbonation*. Energy Fuels 15(2), 256-262. DOI: <https://doi.org/10.1021/ef000245x>
- 11 EAA, 2014. *Bauxite residue management: best practice*
- 12 Grosso, A., 2012. Tailing del processo Bayer: analisi dell'alcalinità e studio del processo industriale di filtropressatura al fine di ridurre l'impatto ambientale. Alma mater studiorum-Università degli studi di Bologna, Corso di Studio in Chimica Industriale.
- 13 Hanahan, C., McConchie, D., Pohl, J., Creelman, R., Clark, M., Stocksiek, C., 2004. *Chemistry of seawater neutralization of bauxite refinery residues (red mud)*. Environ. Eng. Sci. 21(2), 125-138. DOI: <https://doi.org/10.1089/109287504773087309>
- 14 JRC, 2018. Reference Document in Best available Techniques for the Management of waste from extractive industries
- 15 Khaitan, S., Dzombak, D.A., Lowry, G.V., 2009. *Mechanisms of neutralization of bauxite residue by carbon dioxide*. J. Environ. Eng. 135(6), 433-438. DOI: 10.1061/(ASCE)EE.1943-7870.0000010
- 16 Kong, X., Guo, Y., Xue, S., Hartley, W., Wu, C., Ye, Y., Cheng, Q., 2017. *Natural evolution of alkaline characteristics in bauxite residue*. Journal of cleaner production 143, 224-230. DOI: DOI: [10.1016/j.jclepro.2016.12.125](https://doi.org/10.1016/j.jclepro.2016.12.125)
- 17 Li, R., Zhang, T., Liu, Y., Lv, G., Xie, L., 2016. *Calcification-carbonation method for red mud processing*. Journal of Hazardous Materials 316, 94-101. DOI: <https://doi.org/10.1016/j.jhazmat.2016.04.072>
- 18 Liang, G., Chen, W., Nguyen, A.V., Nguyen, T.A.H., 2018. *Red mud carbonation using carbon dioxide: effects of carbonate and calcium ions on goethite surface properties and settling*. Journal of Colloid and Interface Science 517, 230-238. DOI: [10.1016/j.jcis.2018.02.006](https://doi.org/10.1016/j.jcis.2018.02.006)
- 19 Liu, Y., Lin, C., Wu, Y., 2007. *Characterization of red mud derived from a combined Bayer process and bauxite calcination method*. Journal of Hazardous Materials 146 (1-2), 255-261. DOI: 10.1016/j.jhazmat.2006.12.015
- 20 Liu, X., and Zhang, N., 2011. *Utilization of red mud in cement production: a review*. Waste Management and Research 29(10), 1053-1063. DOI: 10.1177/0734242X11407653

- 21 McConchie, D.M., Clark, M.W., Davies-Mc Conchie, F.G., Zilstra, H., Faux, D., Ferguson, L., 2005. *Recent advances in the treatment and reuse of bauxite refinery residues (Bauxsol™)*. 7<sup>th</sup> International Alumina Quality Workshop. AQW Ltd, Perth, Australia, 66-68 (via Clark et al., 2015)
- 22 Menzies, N.W., Fulton, I.M., Morrel, W.J., 2004. *Seawater neutralization of alkaline bauxite residue and implications for revegetation*. J. Environ. Qual. 33(5), 1877-1884. DOI: 10.2134/jeq2004.1877
- 23 Paramguro, R.K., Rath, P.C., Misra, V.N., 2006. *Trends in red mud utilization. A review*. Mineral Processing and Extractive Metallurgy Review 26(1), 1-29. DOI: <https://doi.org/10.1080/08827500490477603>
- 24 Power, G., Gräfe, M., Klauber, C., 2011. *Bauxite residue issues: I. Current management, disposal and storage practices*. Hydrometallurgy 108(1-2), 33-45. DOI: <https://doi.org/10.1016/j.hydromet.2011.02.006>
- 25 Renforth, P., Mayes, W.M., Jarvis, A.P., Burke, I.T., Manning, D.A.C., Gruiz, K., 2012. *Contaminant mobility and carbon sequestration downstream of the Ajka (Hungary) red mud spill: the effects of gypsum dosing*. Science of the Total Environment 421-422, 253-259. DOI: <https://doi.org/10.1016/j.scitotenv.2012.01.046>
- 26 Santini, T.C., Hinz, C., Rate, A.W., Carter, C.M., Gilkes, R.J., 2011. *In situ neutralisation of uncarbonated bauxite residue mud by cross layer leaching with carbonated bauxite residue mud*. Journal of hazardous materials 194, 119-127. DOI: 10.1016/j.jhazmat.2011.07.090.
- 27 Smith, P., 2015. *Reactions of lime under high temperature Bayer digestion conditions*. 10<sup>th</sup> International alumina quality Workshop, 19-23 April 2015. Perth, Western Australia
- 28 Solymar, K., Steiner, J., Zoldi, J., 1997. *Technical peculiarities and viability of hydrothermal treatment of red mud*. Proceeding of TMS Light Metals, 49-54
- 29 Whittington, B.I., 1996. *The chemistry of CaO and Ca(OH)<sub>2</sub> relating to the Bayer process*. Hydrometallurgy 43(1-2), 13-35. DOI: [https://doi.org/10.1016/0304-386X\(96\)00009-6](https://doi.org/10.1016/0304-386X(96)00009-6)
- 30 Yang, J., Xiao, B., 2008. *Development of unsintered construction materials from red mud wastes produced in the sintering alumina process*. Construction and Building Materials 22(12), 2299-2307. DOI: <https://doi.org/10.1016/j.conbuildmat.2007.10.005>

## 18. Lime use in pulp and paper – Precipitated Calcium Carbonate (PCC)

- 1 Ahn, J.-W., Kim, J.-H., Park, H.-S., Kim, J.-A., Han, C., Kim, H., 2005. *Synthesis of single phase aragonite precipitated calcium carbonate in Ca(OH)<sub>2</sub>-Na<sub>2</sub>CO<sub>3</sub>-NaOH reaction system*. Korean Journal of Chemical Engineering 22(6), 852-856. DOI: <https://doi.org/10.1007/BF02705664>
- 2 Bao, W., Li, H., Zhang, Y., 2010. *Selective leaching of steelmaking slag for indirect CO<sub>2</sub> mineral sequestration*. Industrial & Engineering Chemistry Research 49(5), 2055-2063. DOI: <https://doi.org/10.1021/ie801850s>
- 3 Chang, R., Kim, S., Lee, S., Choi, S., Kim, M., Park, Y., 2017. *Calcium carbonate precipitation for CO<sub>2</sub> storage and utilization: a review of the carbonate crystallization and polymorphism*. Frontiers in Energy Research 10. DOI: [10.3389/fenrg.2017.00017](https://doi.org/10.3389/fenrg.2017.00017)
- 4 Dri, M., Sanna, A., Maroto-Valer, M.M., 2013. *Dissolution of steel slag and recycled concrete aggregate in ammonium bisulphate for CO<sub>2</sub> mineral carbonation*. Fuel Processing Technology 113, 114-122. DOI: <https://doi.org/10.1016/j.fuproc.2013.03.034>
- 5 Eloneva, S., Said, A., Fogelholm, C.-J., Zevenhoven, R., 2010. *Feasibility study of a method utilizing carbon dioxide and steelmaking slags to produce precipitated calcium carbonate (PCC)*. In: Proceedings of the 2<sup>nd</sup> International Conference on Applied Energy (ICAE 2010). Singapore, 21-23 April 2010. Pages 169-178. [https://www.researchgate.net/publication/267558532\\_Process\\_efficiency\\_and\\_optimisation\\_of\\_precipitated\\_calcium\\_carbonate\\_PCC\\_production\\_from\\_steel\\_converter\\_slag](https://www.researchgate.net/publication/267558532_Process_efficiency_and_optimisation_of_precipitated_calcium_carbonate_PCC_production_from_steel_converter_slag)
- 6 Erdogan, N. and Eken, H.A., 2017. *Precipitated calcium carbonate production, synthesis and properties*. Physicochemical Problems of Mineral Processing 53(1), 57-68. DOI: <http://dx.doi.org/10.5277/ppmp170105>

- 7 He, L., Yu, D., Lv, W., Wu, J., Xu, M., 2013. *A novel method for CO<sub>2</sub> sequestration via indirect carbonation of coal fly ash*. Industrial & Engineering Chemistry Research 52, 15138-15145. DOI: [dx.doi.org/10.1021/ie4023644](https://doi.org/10.1021/ie4023644)
- 8 Islam, M.S. and Quader, K.M.A., 2008. *Laboratory-scale production of commercial grade calcium carbonate from lime-soda process*. Chemical Engineering Research Bulletin 12, 1-6. DOI: <https://doi.org/10.3329/ceerb.v12i0.1490>
- 9 Järvinen, M., Said, A., Zappa, W., Eloneva, S. Report from Aalto University, School of Engineering 2010. *Success story on mineral carbonation of CO<sub>2</sub>*. Pushing academic research towards industrial scale through advanced modelling and piloting.
- 10 Jimoh, O.A., Otitoju, T.A., Hussin, H., Ariffin, K.S., Baharun, N., 2017. Understanding the precipitated calcium carbonate (PCC) production mechanism and its characteristics in the liquid-gas system using milk of lime (MOL) suspension. The South African Journal of Chemistry 70, 1-7. <https://www.ajol.info/index.php/sajc/article/view/154848>
- 11 Jo, H., Park, S.-H., Jang, Y.-N., Chae, S.-C., Lee, P.-K., Jo, H.Y., 2014. *Metal extraction and indirect mineral carbonation of waste cement material using ammonium salt solutions*. Chemical Engineering Journal 254, 313-323. DOI: <https://doi.org/10.1016/j.cej.2014.05.129>
- 12 JRC, 2013a. *BREF document for iron and steel production*. Available online: [https://eippcb.jrc.ec.europa.eu/reference/BREF/IS\\_Adopted\\_03\\_2012.pdf](https://eippcb.jrc.ec.europa.eu/reference/BREF/IS_Adopted_03_2012.pdf)
- 13 JRC, 2013b. *BREF Document for the Production of cement, lime and magnesium oxide*. Available online: [https://eippcb.jrc.ec.europa.eu/reference/BREF/CLM\\_Published\\_def.pdf](https://eippcb.jrc.ec.europa.eu/reference/BREF/CLM_Published_def.pdf)
- 14 Katsuyama, Y., Yamasaki, A., Iizuka, A., Fujii, M., Kumagai, K., Yanagisawa, Y., 2005. *Development of a process for producing high-purity calcium carbonate (CaCO<sub>3</sub>) from waste cement using pressurized CO<sub>2</sub>*. Environmental Progress vol. 24/2, 162-170. DOI: <https://doi.org/10.1002/ep.10080>
- 15 Lei, M., Li, P.G., Sun, Z.B., Thang, W.H., 2006. *Effects of organic additives on the morphology of calcium carbonate particles in the presence of CTAB*. Materials Letters 60(9-10), 1261-1264. DOI: <https://doi.org/10.1016/j.matlet.2005.11.023>
- 16 Li, G., Li, Z., Ma, H., 2014. *Preparation of aragonite by carbonization in CaCl<sub>2</sub>-NH<sub>4</sub>Cl solution without any additives*. Monatshefte für Chemie - Chemical Monthly 145(1), 187-194. DOI: <https://doi.org/10.1007/s00706-013-0995-6>
- 17 Mattila, H.P. and Zevenhoven, R., 2014. Production of Precipitated Calcium Carbonate from steel converter slag and other calcium-containing industrial wastes and residues. Advanced in Inorganic Chemistry, vol. 66, Chapter 10, 347-384. DOI: <https://doi.org/10.1016/B978-0-12-420221-4.00010-X>
- 18 Mattila, H.-P., Hudd, H., Zevenhoven, R., 2014. *Cradle-to-gate life cycle assessment of precipitated calcium carbonate production from steel converter slag*. Journal of Cleaner Production 84, 611-618. DOI: <https://doi.org/10.1016/j.jclepro.2014.05.064>
- 19 Mathur, V.K., 2002. Precisely sized precipitated calcium carbonate (PCC) crystals of preselected crystal habit, manufactured using pressure carbonation. Available online: <https://patents.com/us-8936771.html>
- 20 Othman, A., Othman, R., Mohd Sabri, S.N., 2017. *Producing Precipitated Calcium Carbonate with and without terpeneol*. Chemical Engineering Transactions 56, 421- 426. DOI: <https://doi.org/10.3303/CET1756071>
- 21 Pan, S.-Y., Chiang, A., Chang, E-E, Lin, Y.-P., Kim, H., Chiang, P.-C., 2015. *An innovative approach of integrated carbon mineralization and waste utilization: a review*. Aerosol and Air Quality Research 15(3), 1072-1091. DOI: 10.4209/aaqr.2014.10.0240
- 22 Patent US 7,378,073 B2. Inventor: de Pauw Gerlings, Martinus J.H., Date of publication: 27.05.2008. Available online: <https://patentimages.storage.googleapis.com/d5/3a/7d/d9e101813df8a1/US7378073.pdf>
- 23 Pohl, M., Rainer, C., Primosch, G., 2011. *Patent EP2371766A1: Process for obtaining precipitated calcium carbonate*. <https://patents.google.com/patent/EP2371766A1/en?qoq=+EP+2371766A1>
- 24 Said, A., Mattila, H.-P., Järvinen, M., Zevenhoven, R., 2013. *Production of precipitated calcium carbonate (PCC) from steelmaking slag for fixation of CO<sub>2</sub>*. Applied Energy 112, 765-771. DOI: <https://doi.org/10.1016/j.apenergy.2012.12.042>

- 25 Schyvinck, L., 2012. *Reducing CO<sub>2</sub> emissions*. Workshop on CO<sub>2</sub> reuse, October 24, 2012, Brussels.
- 26 Sezer, N., 2013. *Production of precipitated calcium carbonate from marble wastes*. Master Thesis in Mining Engineering, Middle East Technical University. Available online: <http://etd.lib.metu.edu.tr/upload/12616347/index.pdf>
- 27 Steinhäuser, G., 2008. *Cleaner Production in the Solvay Process: general strategies and recent developments*. Journal of Cleaner Production 16(7), 833-841. DOI: <https://doi.org/10.1016/j.jclepro.2007.04.005>
- 28 Stolaroff, J.K., Lowry, G.V., Keith, D.W., 2005. *Using CaO- and MgO-rich industrial waste streams for carbon sequestration*. Energy Conversion and Management 46(5), 687-699. DOI: <https://doi.org/10.1016/j.enconman.2004.05.009>
- 29 Sundermann, C.M., 2016. *Production of calcium carbonate from steelmaking slag and captured CO<sub>2</sub>- Optimization of the carbonation process and product quality*. Master Thesis in Innovative Sustainable Energy Engineering, Aalto University, Finland and Royal Institute of Technology, Sweden. Available online: [https://aaltodoc.aalto.fi/bitstream/handle/123456789/23965/master\\_Sundermann\\_Carla\\_2016.pdf?sequence=1&isAllowed=y](https://aaltodoc.aalto.fi/bitstream/handle/123456789/23965/master_Sundermann_Carla_2016.pdf?sequence=1&isAllowed=y)
- 30 Teir, S., Eloneva, S., Zevenhoven, R., 2005. *Production of precipitated calcium carbonate from calcium silicates and carbon dioxide*. Energy Conversion and Management 46(18-19), 2954-2979. DOI: <https://doi.org/10.1016/j.enconman.2005.02.009>
- 31 Teir, S., Eloneva, S., Fogelholm, C.-J., Zevenhoven, R., 2007. *Dissolution of steelmaking slags in acetic acid for precipitated calcium carbonate production*. Energy 32(4), 528-539. DOI: <https://doi.org/10.1016/j.energy.2006.06.023>
- 32 Teir, S., Eloneva, S., Revitzer, H., Zevenhoven, R., Salminen, J., Fogelholm, C.-J., Poylio, E., 2013. *Patent US 8,603,428 B2/2013. Method of producing calcium carbonate from waste and by-product*. Available online: <https://patents.google.com/patent/US8603428B2/en>
- 33 Teir, S., Auvinen, T., Said, A., Kotiranta, T., Peltola, H., 2016. *Performance of separation processes for precipitated calcium carbonate produced with an innovative method from steelmaking slag and carbon dioxide*. Frontiers in Energy Research 4, Article 6, 1-13. DOI: 10.3389/fenrg.2016.00006
- 34 Thriveni, T., Il, U.N., Ahn, J.W., 2013. *Aragonite precipitated calcium carbonate: a new versatile functional filler for light weight plastic*. In: Proceedings of the 8<sup>th</sup> Pacific Rim International Conference on Advanced Materials and Processing. Edited by Fernand Marquis, The Minerals, Metals and Materials Society, 243-253. DOI: [https://doi.org/10.1007/978-3-319-48764-9\\_31](https://doi.org/10.1007/978-3-319-48764-9_31)
- 35 Uibu, M., Velts, O., Kuusik, R., 2010. *Developments in CO<sub>2</sub> mineral carbonation of oil shale ash*. Journal of Hazardous Materials 174(1-3), 209-214. DOI: <https://doi.org/10.1016/j.jhazmat.2009.09.038>
- 36 Velts, O., Uibu, M., Kallas, J., Kuusik, R., 2011. *Waste oil shale ash as a novel source of calcium for precipitated calcium carbonate: carbonation mechanism, modelling, and product characterization*. Journal of Hazardous Materials 195, 139-146. DOI: 10.1016/j.jhazmat.2011.08.019
- 37 Velts, O., Uibu, M., Kallas, J., Kuusik, R., 2013. *CO<sub>2</sub> mineralisation: concept for co-utilization of oil shale energetics waste streams in CaCO<sub>3</sub> production*. Energy Procedia 37, 5921-5928. DOI: <https://doi.org/10.1016/j.egypro.2013.06.518>
- 38 Wardhani, S., Prasetya, F., Khunur, M.M., Purwonugroho, D., Prananto, Y.P., 2018. *Effect of CO<sub>2</sub> flow rate and carbonation temperature in the synthesis of crystalline precipitated calcium carbonate (PCC) from limestone*. Indonesian Journal of Chemistry 18(4), 573-579. DOI: 10.22146/ijc.26608
