# Supplementary material
Source: publisher figshare collection journal article supplement (https://tandf.figshare.com/articles/dataset/_/17133719)
Supplement: Supplementary file 3 [file 1]

## Supplementary materials

### 1. References of documents in Table 3

|        |                                                                       |    |
|--------|-----------------------------------------------------------------------|----|
| 1.     | Lime use in iron and steel industry.....                              | 3  |
| 1.1    | Lime use in iron slags .....                                          | 3  |
| 1.1.1. | Natural carbonation .....                                             | 3  |
| 1.1.2. | Enhanced carbonation.....                                             | 3  |
| 1.2    | Lime use in steel slags.....                                          | 3  |
| 1.2.1. | Natural carbonation .....                                             | 3  |
| 1.2.2. | Enhanced carbonation.....                                             | 4  |
| 2.     | Lime use in sand lime brick.....                                      | 6  |
| 3.     | Lime use in light-weight concrete – autoclaved aerated concrete ..... | 6  |
| 4.     | Lime use in mortars .....                                             | 6  |
| 4.1    | Pure air-lime mortars.....                                            | 6  |
| 4.2    | Mixed air-lime mortars .....                                          | 6  |
| 5.     | Lime use in hemp-lime .....                                           | 6  |
| 6.     | Lime use in soil stabilisation .....                                  | 7  |
| 7.     | Lime use in asphalt pavements .....                                   | 8  |
| 8.     | Lime use in drinking water .....                                      | 8  |
| 9.     | Lime use in wastewater treatment- biosolids.....                      | 8  |
| 10.    | Lime use in sludge treatment - dredging sediments .....               | 8  |
| 11.    | Lime use in flue gas cleaning system.....                             | 9  |
| 11.1   | .....Natural carbonation                                              | 9  |
| 11.2   | .....Enhanced carbonation                                             | 9  |
| 12.    | Lime use in acid mine drainage .....                                  | 10 |
| 13.    | Lime use in agriculture .....                                         | 10 |
| 13.1   | .....Soil neutralisation                                              | 10 |
| 13.2   | .....Increment of soil organic carbon                                 | 11 |
| 14.    | Lime use in calcium carbide.....                                      | 11 |
| 15.    | Lime use in base and precious metals, lithium.....                    | 12 |
| 15.1   | .....Lime use in copper                                               | 12 |
| 15.2   | .....Lime use in nickel                                               | 12 |
| 15.3   | .....Lime use in zinc and lead                                        | 13 |
| 15.4   | .....Lime use in gold                                                 | 14 |
| 15.5   | .....Lime use in platinum                                             | 15 |
| 15.6   | .....Lime use in lithium                                              | 15 |

|      |                                                                        |    |
|------|------------------------------------------------------------------------|----|
| 16.  | Lime use in titanium dioxide production – red gypsum.....              | 16 |
| 17.  | Lime use in aluminium production – red mud .....                       | 16 |
| 18.  | Lime use in pulp and paper – Precipitated Calcium Carbonate (PCC)..... | 17 |
| 18.1 | Precipitated Calcium Carbonate – Traditional.....                      | 17 |
| 18.2 | Precipitated Calcium Carbonate – Slag.....                             | 17 |

## 1. Lime use in iron and steel industry

### 1.1 Lime use in iron slags

#### 1.1.1. Natural carbonation

- 1 Gupta, J.D., Kneller, W.A., Tamarisa, R., Skrypczak-Jankun, E., 1994. Characterization of base and subbase iron and steel slag aggregates causing deposition of calcareous tufa in drains. Transportation research record n. 1434, published by Transportation research board
- 2 Mayes, W.M., Riley, A.L., Gomes, H.I., Brabham, P., Hamlyn, J., Pullin, H., Renforth, P., 2018. *Atmospheric CO<sub>2</sub> sequestration in iron and steel slag: Consett, County Durham, United Kingdom*. Environmental Science and Technology 52(14), 7892-7900. DOI: <https://doi.org/10.1021/acs.est.8b01883>

#### 1.1.2. Enhanced carbonation

*Peer reviewed papers*

- 1 Chang, E.E., Chen, C.H., Chen Y.H., Pan, S.Y., Chiang, P.C., 2011a. Performance evaluation for carbonation of steel-making slags in a slurry reactor. Journal of Hazardous Materials 186(1), 558-564. DOI: 10.1016/j.jhazmat.2010.11.038
  - 2 Chang, E.E., Pan, S.Y., Chen, Y.H., Chu, H.W., Wang C.F., Chiang, P.C., 2011b. CO<sub>2</sub> sequestration by carbonation of steelmaking slags in an autoclave reactor. J. Hazard. Mater. 195, 107-114. DOI: <https://doi.org/10.1016/j.jhazmat.2011.08.006>
  - 3 Chiang, Y.W., Santos, R.M., Elsen, J., Meesschaert, B., Martens, J.A., Van Gerven, T., 2014. Towards zero-waste mineral carbon sequestration via two-way valorization of ironmaking slag. Chemical Engineering Journal, 249, 260-269. DOI: <http://dx.doi.org/10.1016/j.cej.2014.03.104>
  - 4 Eloneva, S., Teir, S., Salminen, J., Fogelholm, C.J., Zevenhoven, R., 2008. Fixation of CO<sub>2</sub> by carbonating calcium derived from blast furnace slag. Energy 33(9), 1461-1467. DOI: <https://doi.org/10.1016/j.energy.2008.05.003>
  - 5 Hu, J., Liu, W., Wang, L., Liu, Q., Chen, F., Yue, H., Liang, B., Lü, L., Wang, Y., Zhang, G., Li, C., 2017. *Indirect mineral carbonation of blast furnace slag with (NH<sub>4</sub>)<sub>2</sub>SO<sub>4</sub> as a recyclable extractant*. Journal of Energy Chemistry 26(5), 927-935. DOI: <https://doi.org/10.1016/j.jechem.2017.06.009>
  - 6 Johnson, D.C., 2000. Accelerated carbonation of waste calcium silicate materials. SCI lecture papers series, 1-10
  - 7 Lee, S., Kim, J.W., Chae, S., Bang, J.H., Lee, S.W., 2016. *CO<sub>2</sub> sequestration technology through mineral carbonation: an extraction and carbonation of blast slag*. Journal of CO<sub>2</sub> utilization 16, 336-345. DOI: <https://doi.org/10.1016/j.jcou.2016.09.003>
  - 8 Mun, M. and Cho, H., 2013. *Mineral carbonation for carbon sequestration with industrial waste*. Energy Procedia 37, 6999-7005. DOI: <https://doi.org/10.1016/j.egypro.2013.06.633>
  - 9 Uliasz-Bochenczyk, A. and Mokrzycki, E., 2017. *CO<sub>2</sub> mineral sequestration with the use of ground granulated blast furnace slag*. Mineral resources management 33(1), 111-124. DOI: 10.1515/gospo-2017-0008
- BREF document*
- 10 JRC, 2013. *Best Available Techniques (BAT) Reference document for iron and steel production*. Available online: [https://eippcb.jrc.ec.europa.eu/reference/BREF/IS\\_Adopted\\_03\\_2012.pdf](https://eippcb.jrc.ec.europa.eu/reference/BREF/IS_Adopted_03_2012.pdf)
  - 11 Eurofer, 2018. European steel in Figures, 2018. <http://www.eurofer.org/News%26Events/News/European%20Steel%20in%20Figures%202018.fhtml> (latest access April 2019)
  - 12 Euroslag, 2016. Statistics, 2016. <https://www.euroslag.com/products/statistics/statistics-2016/> (latest access April 2019)

### 1.2 Lime use in steel slags

#### 1.2.1. Natural carbonation

*Peer reviewed papers*

- 1 Gupta, J.D., Kneller, W.A., Tamarisa, R., Skrypczak-Jankun, E., 1994. Characterization of base and subbase iron and steel slag aggregates causing deposition of calcareous tufa in drains. Transportation research record n. 1434, published by Transportation research board
  - 2 Horii, K., Kato, T., Sughara, K., Tsutsumi, N., Kitano, Y., 2015. Overview of iron/steel slag application and development of new utilization technologies. Nippon Steel & Sumitomo Metal Technical Report n.109, July 2015. Available online: <https://www.nipponsteel.com/en/tech/report/nssmc/pdf/109-03.pdf>
  - 3 Navarro, C., Díaz, M., Villa-García, M.A., 2010. Physico-chemical characterization of steel slag. Study of its behaviour under simulated environmental conditions. Environ. Sci. Technol. 44, 5383-5388. DOI: 10.1021/es100690b
  - 4 Rondi, L., Bregoli, G., Sorlini, S., Cominoli, L., Collivignarelli, C., 2016. *Concrete with EAF steel slag as aggregate: a comprehensive technical and environmental characterization*. Composites Part B: Engineering 90, 195-202. DOI: <https://doi.org/10.1016/j.compositesb.2015.12.022>
  - 5 Spanka, M., Mansfeldt, T., Bialucha, R., 2016. *Influence of natural and accelerated carbonation of steel slags on their leaching behaviour*. Steel research international 87(6), 798-810. DOI: <https://doi.org/10.1002/srin.201500370>
  - 6 Suer, P., Lindqvist, J.E., Arm, M., Frogner-Kockum, P., 2009. *Reproducing ten years of road ageing. Accelerated carbonation and leaching of EAF steel slag*. Science of the Total Environment 407(18), 5110-5118. DOI: <https://doi.org/10.1016/j.scitotenv.2009.05.039>
  - 7 Yildirim, I.Z., and Prezzi, M., 2015. *Geotechnical properties of fresh and aged basic oxygen furnace steel slag*. J. Mater. Civ. Eng 27(12), 1-11. Available online: <https://ascelibrary.org/doi/10.1061/%28ASCE%29MT.1943-5533.0001310>
- BREF document*
- 8 JRC, 2013. *Best Available Techniques (BAT) Reference document for iron and steel production*. Available online: [https://eippcb.jrc.ec.europa.eu/reference/BREF/IS\\_Adopted\\_03\\_2012.pdf](https://eippcb.jrc.ec.europa.eu/reference/BREF/IS_Adopted_03_2012.pdf)

**1.2.2. Enhanced carbonation**

*Peer reviewed papers*

- 1 Baciocchi, R., Costa, G., Di Gianfilippo, M., Poletti, A., Pomi, R., Stramazzo, A., 2015. Thin-film versus slurry-phase carbonation of steel slag: CO<sub>2</sub> uptake and effects on mineralogy. Journal of Hazardous Materials 283, 302-313. DOI: <https://doi.org/10.1016/j.jhazmat.2014.09.016>
- 2 Baciocchi, R., Costa, G., Poletti, A., Pomi, R., Stramazzo, A., Zingaretti, D., 2016. Accelerated carbonation of steel slags using CO<sub>2</sub> diluted sources: CO<sub>2</sub> uptakes and energy requirements. Frontiers in Energy Research 3(56), 1-10. DOI: 10.3389/fenrg.2015.00056
- 3 Bonenfant, D., Kharoune, L., Sauvé, S., Hausler, R., Niquette, P., Mimeault, M., Kharoune, M., 2008. CO<sub>2</sub> sequestration potential of steel slags at ambient pressure and temperature. Ind. Eng. Chem. Res. 47(20), 7610-7616. DOI: <https://doi.org/10.1021/ie701721j>
- 4 Boone, M.A., Nielsen, P., De Kock, T., Boone, M.N., Quaghebeur, M., Cnudde, V., 2014. Monitoring of stainless-steel slag carbonation using X-ray computed microtomography. Environmental Science and Technology 48(1), 674-680. dx.doi.org/10.1021/es402767q
- 5 Capobianco, O., Costa, G., Thuy, L., Magliocco, E., Hartog, N., Baciocchi, R., 2014. Carbonation of stainless steel slag in the context of in situ Brownfield remediation. Minerals Engineering 59, 91-100. DOI: <https://doi.org/10.1016/j.mineng.2013.11.005>
- 6 Chang, E.E., Pan, S.Y., Chen, Y.H., Tan, C.S., Chiang, P.C., 2012. Accelerated Carbonation of Steelmaking Slags in a High-Gravity Rotating Packed Bed. J. Hazard. Mater., 227-228, 97-106. DOI: <https://doi.org/10.1016/j.jhazmat.2012.05.021>
- 7 Dhoble, Y.N., and Ahmed, S., 2018. Review on the innovative uses of steel slag for waste minimization. Journal of Material Cycles and Waste Management 20(3), 1373-1382. DOI: <https://doi.org/10.1007/s10163-018-0711-z>

- 8 Ghacham, A.B., Pasquier, L.C., Cecchi, E., Blais, J.F., Mercier, G., 2016. CO<sub>2</sub> sequestration by mineral carbonation of steel slags under ambient temperature: parameters influence, and optimization. *Environ Sci Pollut Res* 23, 17635-17646. DOI : 10.1007/s11356-016-6926-4
- 9 Huijgen, W.J.J., Comans, R.N.J., Witkamp, G.J., 2005. *Mineral CO<sub>2</sub> sequestration by steel slag carbonation*. *Environmental Science and Technology* 39(24), 9676-9682. DOI: <https://doi.org/10.1021/es050795f>
- 10 Huijgen, W.J.J., and Comans, R.N.J., 2006. *Carbonation of steel slag for CO<sub>2</sub> sequestration: leaching of products and reaction mechanisms*. *Environ. Sci. Technolog.* 40(8), 2790-2796. DOI: <https://doi.org/10.1021/es052534b>
- 11 Lekakh, S.N., Rawlins, C.H., Robertson, D.G.C., Richards, V.L., Peaslee, K.D., 2008. *Kinetics of aqueous leaching and carbonization of steelmaking slag*. *Metallurgical and material transactions B* 39(1), 125-134. DOI: 10.1007/s11663-007-9112-8
- 12 Morone, M., Costa, G., Poletti, A., Pomi, R., Baciocchi, R., 2014. *Valorization of steel slag by a combined carbonation and granulation treatment*. *Minerals Engineering* 59, 82-90. DOI: <https://doi.org/10.1016/j.mineng.2013.08.009>
- 13 Motz, H., and Geiseler, J., 2001. *Products of steel slags an opportunity to save natural resources*. *Waste Management* 21(3), 285-293. DOI: [https://doi.org/10.1016/S0956-053X\(00\)00102-1](https://doi.org/10.1016/S0956-053X(00)00102-1)
- 14 Pan, S.Y., Chang, E.E., Chiang, P.C., 2012. *CO<sub>2</sub> capture by accelerated carbonation of alkaline wastes: a review on its principles and applications*. *Aerosol and air quality research* 12(5), 770-791. DOI: 10.4209/aaqr.2012.06.0149
- 15 Pan, S.Y., Chiang, P.C., Chen, Y.H., Tan, C.S., Chang, E.E., 2013. *Ex situ CO<sub>2</sub> capture by carbonation of steelmaking slag coupled with metalworking wastewater in a rotating packed bed*. *Environmental Science and Technology* 47(7), 3308-3315. DOI: <https://doi.org/10.1021/es304975y>
- 16 Pan, S.Y., Adhikari, R., Chen, Y.H., Li, P., Chiang, P.C., 2016. Integrated and innovative steel slag utilization for iron reclamation, green material production and CO<sub>2</sub> fixation via accelerated carbonation. *Journal of Cleaner Production* 137, 617-631. DOI: <https://doi.org/10.1016/j.jclepro.2016.07.112>
- 17 Pan, S.Y., Chung, T.C., Ho, C.C., Hou, C.J., Chen, Y.H., Chiang, P.C., 2017. *CO<sub>2</sub> mineralization and utilization using steel slag for establishing a waste-to resources supply chain*. *Scientific reports* 7(17227), 1-11. DOI : 10.1038/s41598-017-17648-9
- 18 Quaghebeur, M., Nielsen, P., Laenen, B., Nguyen, E., van Mechelen, D., 2010. *Carbstone: sustainable valorisation technology for fine grained steel slags and CO<sub>2</sub>*. *Refractories worldforum* 2(2), 75-79. Available online: [https://www.refractories-worldforum.com/paper?article\\_id=100038](https://www.refractories-worldforum.com/paper?article_id=100038)
- 19 Quaghebeur, M., Nielsen, P., Horckmans, L., van Mechelen, D., 2015. *Accelerated carbonation of steel slag compacts: development of high-strength construction materials*. *Frontiers in Energy Research* 3, 1-12. DOI: <https://doi.org/10.3389/fenrg.2015.00052>
- 20 Santos, R., Francois, D., Vanderveelde, E., Mertens, G., Elsen, J., Van Gerven, T., 2010. *Process intensification routes for mineral carbonation*. *Proceedings of the third International Conference on accelerated Carbonation for Environmental and Materials Engineering ACEME10*, Turku (Finland), Nov. 29-Dec. 1, 2010
- 21 Santos, R.M., Van Bouwel, J., Vanderveelde, E., Mertens, G., Elsen, J., Van Gerven, T., 2013. Accelerated mineral carbonation of stainless steel slags for CO<sub>2</sub> storage and waste valorisation: effects of process parameters on geochemical properties. *Int. J. Greenhouse Gas Control* 17, 32-45. DOI: <http://dx.doi.org/10.1016/j.ijggc.2013.04.004>
- 22 Yu, J. and Wang, K., 2011. *Study on characteristics of steel slag for CO<sub>2</sub> capture*. *Energy Fuels* 25(11), 5483-5492. DOI: <https://doi.org/10.1021/ef2004255>
- 23 Zingaretti, D., Costa, G., Baciocchi, R., 2013. *Assessment of accelerated carbonation processes for CO<sub>2</sub> storage using alkaline industrial residues*. *Ind. Eng. Chem. Res.* 53(22), 9311-9324. DOI: <https://doi.org/10.1021/ie403692h>  
*Report*
- 24 Baciocchi, R., Costa, G., Zingaretti, D., Cazzotti, M., Werner, M., Poletti, A., Pomi, R., Falasca, M., 2010. Studio sulle potenzialità della carbonatazione di minerali e residui industriali per lo stoccaggio

di anidride carbonica prodotta da impianti di piccola/media taglia. Report ENEA-Ministero dello Sviluppo Economico Ricerca di Sistema Elettrico

*Master thesis*

- 25 Thuy, L.A.D., 2013. *Lab-scale feasibility of in-situ carbonation of alkaline industrial wastes*. Master thesis, Faculty of Geosciences, Utrecht University (The Netherlands).
- 26 JRC, 2013. *Best Available Techniques (BAT) Reference document for the production of cement, lime and magnesium oxide*. Available online: <https://ec.europa.eu/jrc/en/publication/reference-reports/best-available-techniques-bat-reference-document-production-cement-lime-and-magnesium-oxide>

## **2. Lime use in sand lime brick**

- 1 Eden, W., Kaczmarek, T., Meyer, G., Waltermann, G., Steiger, P., 1995. *Ökobilanz für den Baustoff Kalksandstein und Kalksand stein-Wandkonstruktionen*. (Life Cycle Assessment of Calcium Silicate Mansory Units). Research report n°82, Forschungsvereinigung Kalk-Sand eV, Hannover, November 1995

## **3. Lime use in light-weight concrete – autoclaved aerated concrete**

*Peer reviewed papers*

- 1 Haas M., 2005. *Carbonation of AAC*. International Conference about autoclaved aerated concrete; innovation and developments, Taylor and Francis Group, London, ISBN. 0415383560
- 2 Matsushita, F., Aono, Y., Shibata, S., 2000a. *Carbonation degree of autoclaved aerated concrete*. Cement and Concrete Research 30(11), 1741-1745. DOI: [https://doi.org/10.1016/S0008-8846\(00\)00424-5](https://doi.org/10.1016/S0008-8846(00)00424-5)
- 3 Matsushita, F. and Shibata, S., 2000b. *Carbonation degree as durability criteria for autoclaved aerated concrete*. Special Publication about the 5<sup>th</sup> CANMET/ACI International conference on durability of concrete, 192, 1123-1134
- 4 Matsushita, F., Aono, Y., Shibata, S., 2004a. *Microstructure changes in autoclaved aerated concrete during carbonation under working and accelerated conditions*. Journal of Advanced Concrete Technology 2(1), 121-129. Available online: [https://www.jstage.jst.go.jp/article/jact/2/1/2\\_1\\_121/pdf/-char/en](https://www.jstage.jst.go.jp/article/jact/2/1/2_1_121/pdf/-char/en)
- 5 Matsushita, F., Aono, Y., Shibata, S., 2004b. *Calcium silicate structure and carbonation shrinkage of a tobermorite-based material*. Cement and Concrete Research 34(7), 1251-1257. DOI: <https://doi.org/10.1016/j.cemconres.2003.12.016>
- 6 Matsushita, F., Aono, Y., Shibata, S., 2004c. *Carbonation Resistance of Water-Repellent Autoclaved Aerated Concrete*. Journal of the Society of Inorganic Materials 11(311), 219-233. DOI: <https://doi.org/10.11451/mukimate2000.11.219>

## **4. Lime use in mortars**

### **4.1 Pure air-lime mortars**

- 1 EESAC, 2013. An estimation of the carbonation degree of air-lime based mortars based on a bibliographic review.

### **4.2 Mixed air-lime mortars**

- 1 EESAC, 2014. An estimation of the carbonation degree of mortars consisting of a combination of air lime and hydraulic binder based on a bibliographic review.

## **5. Lime use in hemp-lime**

*Peer-reviewed papers*

- 1 Arrigoni, A., Pelosato, R., Melià, P., Ruggieri, G., Sabbadini, S., Dotelli, G., 2017. Life cycle assessment of natural building materials: the role of carbonation, mixture components and transport in the environmental impacts of hempcrete blocks. Journal of Cleaner Production 149: 1051-1061. DOI: <http://dx.doi.org/10.1016/j.jclepro.2017.02.161>

- 2 Boutin, M.-P., Flamin, C., Quinton, S., Gosse, G., Lille, I., 2006. Etude des caractéristiques environnementales du chanvre par l'analyse de son cycle de vie. Paris, Ministère de l'agriculture et de la pêche.
- 3 Chabannes, M., Garcia-Diaz, E., Clerc, L., Bénézet, J.-C., 2015. Studying the hardening and mechanical performances of rice husk and hemp-based building materials cured under natural and accelerated carbonation. In: *Construction and Building Materials*, 94, 105-115. DOI: <http://dx.doi.org/10.1016/j.conbuildmat.2015.06.032>
- 4 Hirst, E. A. J., Walker, P., Paine, K. A., Yates, T., 2012. Characteristics of low-density hemp-lime building materials. In: *Proceedings of Institution of Civil Engineers: Construction Materials*, 165, 1, 15-23. DOI: <https://doi.org/10.1680/coma.1000021>
- 5 Ip, K. and Miller, A., 2012. Life cycle greenhouse gas emissions of hemp-lime wall constructions in the UK. *Resources, Conservation and Recycling*, 69, 1-9. DOI: <https://doi.org/10.1016/j.resconrec.2012.09.001>
- 6 Jami, T., and Kumar, S. (2017). Assessment of carbon sequestration of hemp concrete. *International Conference on Advances in Construction Materials and Systems*, Chennai, India. Available online: [https://www.researchgate.net/publication/320058537\\_Assessment\\_of\\_Carbon\\_Sequestration\\_of\\_Hemp\\_Concrete](https://www.researchgate.net/publication/320058537_Assessment_of_Carbon_Sequestration_of_Hemp_Concrete)
- 7 Lecompte, T., Levasseur, A., Maxime, D., 2017. Lime and hemp concrete LCA: a dynamic approach of GHG emissions and capture. In: *2nd International Conference on Bio-based Building Materials & 1st Conference on ECOlogical valorisation og GRAnular and Fibrous materials*, June 21st-23th 2017, Clermont-Ferrand, France.  
*Meeting proceedings or seminars*
- 8 Prétot, S., Collet, F., Garnier, C., 2014. Life cycle assessment of a hemp concrete wall: impact of thickness and coating. *Building and Environment*, 72, 223-231. DOI: <https://doi.org/10.1016/j.buildenv.2013.11.010>
- 9 Sinka, M., Van den Heede, P., De Belie, N., Bajare, D., Sahmenko, G., Korjamins, A., 2018. Comparative life cycle assessment of magnesium binders as an alternative for hemp concrete. In: *Resources, Conservation & Recycling*, 133, 288-299. DOI: <https://doi.org/10.1016/j.resconrec.2018.02.024>

## 6. Lime use in soil stabilisation

### *Peer-reviewed papers*

- 1 Bagonza, S., Peete, J.M., Newill, D., Freer-Hewish, R., 1987. *Carbonation of stabilized soil-cement and soil-lime mixtures*. In: *Proceedings of Seminar H, PTRC Transport and Planning Summer Annual Meeting*, University of Bath, 7-11 September 1987. London: PTRC Education and Research Services, 29-48. Available online: [https://assets.publishing.service.gov.uk/media/5cdbefe2ed915d5c54bcba2c/1\\_515\\_PA1187\\_1987.pdf](https://assets.publishing.service.gov.uk/media/5cdbefe2ed915d5c54bcba2c/1_515_PA1187_1987.pdf)
- 2 Deneele, D., Nael, J., Dony, A., Colin, J., Herrier, G., Lesueur, D., 2013. La carbonatation d'un sol traite a la chaux-approche experimentale (The carbonation of a lime-treated soil-experimental approach). *Conference TerDOUEST 2013 Seminar*, at Marne-la-Vallée. Available online: [https://www.researchgate.net/publication/315114454\\_THE\\_CARBNATION\\_OF\\_A\\_LIME-TREATED\\_SOIL\\_-\\_EXPERIMENTAL\\_APPROACH](https://www.researchgate.net/publication/315114454_THE_CARBNATION_OF_A_LIME-TREATED_SOIL_-_EXPERIMENTAL_APPROACH)
- 3 Eades, J.L., Nichols, F.P., Grim R.E., 1962. *Formation of new minerals with lime stabilization as proven by field experiments in Virginia*. In: *Lime Stabilization mix design, properties, and process*, 41st annual meeting of Highway Research Board, 8-12 January 1962. Available online: <http://onlinepubs.trb.org/Onlinepubs/hrbulletin/335/335.pdf>
- 4 Haas, S. and Ritter, H.J., 2018. *Soil improvement with quicklime - long-time behaviour and carbonation*. *Road Materials and Pavement Design*, 20(8), 1941-1951. DOI: <https://doi.org/10.1080/14680629.2018.1474793>
- 5 Jawad, I.T., Taha, M.R., Majeed, Z.H., Khan, T.A., 2014. *Soil stabilization using lime: advantages, disadvantages and proposing a potential alternative*. *Research Journal of Applied Sciences, Engineering and Technology*, 8(4), 510-520. DOI: 10.19026/rjaset.8.1000



*Meeting proceedings or seminars*

- 6 Paige-Green, P., 2011. *Considerations for ensuring the durability of chemically stabilized road materials*. Proceedings of the Institution of Civil Engineers - Ground Improvement, 164(4): 245-252, doi: 10.1680/grim.900044

## **7. Lime use in asphalt pavements**

- 1 AENOR (Asociación Española de Normalización y Certificación), 2019. PNE-UNE 41260-1 IN:2019 Materials for road pavements. Bituminous mixes. Part 1: Use of hydrated lime as a filler mineral powder.
- 2 Epps, J., Berger, E., Anagnos, J. N., 2003. Topic 4 – Treatments. In: Moisture Sensitivity of Asphalt Pavements A NATIONAL SEMINAR, February 4 - 6 2003, San Diego, California. DOI: 10.17226/21957
- 3 EuLA, 2010. Hydrated lime: a proven additive for durable asphalt pavements. Critical literature review. Report to the European Lime Association / Asphalt Task Force.
- 4 Graves, R. E., 1992. *Lime in Sand for Hot Mix Asphalt - Test Project Summary*. In: Internal Memorandum, Chemical Lime Group.
- 5 Lesueur, D., Joëlle, P., Ritter, H.-J., 2013. *The mechanisms of hydrated lime modification of asphalt mixtures: a state-of-the-art review*. In: Road Materials and Pavement Design, 14, 1, 1-16. DOI: 10.1080/14680629.2012.743669
- 6 Little, D. N., Epps, J. A., Sebaaly, P. E., 2006. *The benefits of hydrated lime in Hot Mix Asphalt*. Prepared for the National Lime Association.
- 7 Schlegel, T., Puiatti, D., Ritter, H.-J., Lesueur, D., Denayer, C., Shtiza, A., 2016. The limits of partial life cycle assessment studies in road construction practices: A case study on the use of hydrated lime in Hot Mix Asphalt. In: Transportation Research Part D, 48, 141-160. DOI: 10.1016/j.trd.2016.08.005

## **8. Lime use in drinking water**

*Peer reviewed papers*

- 1 Scholz, R., Jeschar, R., Jennes, R., Fuchs, W., 1997. *Umweltgesichtspunkte bei der Herstellung und Anwendung von Kalkprodukten, Teil 3*. Zement, Kalk, Gips International, 50(11), 632-644. Available online: <https://www.tib.eu/de/suchen/id/tema%3ATEMAU98030018586/Umweltgesichtspunkte-bei-der-Herstellung-und-Anwendung/>
- 2 Wiley, 1981. *Lime softening sludge treatment and disposal*. American Water Works Association, 73(11), 600-608. Preview available online: [https://www.jstor.org/stable/41270613?seq=1#page\\_scan\\_tab\\_contents](https://www.jstor.org/stable/41270613?seq=1#page_scan_tab_contents)

## **9. Lime use in wastewater treatment- biosolids**

*Scientific papers*

- 1 Neuschäfer, Peschen, Schmidit, 1991. *Deponierfähigkeit von Klärschlämmen - Erfordernisse an die Vor - und Nachbehandlung der Schlämme* (Landfill capacity of sewage sludge. Requirements of pre and post-treatment of sludge). Abwassertechnik, Heft 2, S33-36. Available online: <https://www.kalk.de/service/publikationen/fachpublikationen/klaerschlamme/>
- 2 Witte, H., Strunkheide, J., Priebe, L., 2000. *Senkung des Schlammindex durch gezielte Steuerung der Kalkdosierung am Biespiel der Kläranlage Wathlingen* (Reduction of the sludge index through control of the lime dosage at the wastewater treatment plant in Wathlingen). Wasser und Abfall, Heft 1-2, S52-57

## **10. Lime use in sludge treatment - dredging sediments**

*Scientific papers*

- 1 Eades, J.L., Nichols Jr, F.P., Grim, R.E., 1962. *Formation of new minerals with lime stabilization as proven by field experiments in Virginia*. In: Lime Stabilization mix design, properties, and process, 41<sup>st</sup> annual meeting of Highway Research Board, 8-12 January 1962. Available online: <http://onlinepubs.trb.org/Onlinepubs/hrbulletin/335/335.pdf>



- 2 Haas, S. and Ritter, H.J., 2018. *Soil improvement with quicklime - long-time behaviour and carbonation*. Road Materials and Pavement Design. DOI: <https://doi.org/10.1080/14680629.2018.1474793>

## 11. Lime use in flue gas cleaning system

### 11.1 Natural carbonation

*Peer reviewed papers*

- 1 Baciocchi, R., Costa, G., Di Bartolomeo, E., Poletti, A., Pomi, R., 2009a. *The effect of accelerated carbonation on CO<sub>2</sub> uptake and metal release from incineration APC residues*. Waste Management 29(12), 2994-3003. DOI: <https://doi.org/10.1016/j.wasman.2009.07.012>
- 2 Baciocchi, R., Poletti, A., Pomi, R., Prigiobbe, V., Von Zedwitz, V.N., Steinfeld, A., 2006. *CO<sub>2</sub> sequestration by direct gas-solid carbonation of air pollution control (APC) residues*. Energy Fuels 20(5), 1933-1940. DOI: <https://doi.org/10.1021/ef060135b>
- 3 Bodénan, F., Deniard, P., 2003. Characterization of flue gas cleaning residues from European solid waste incinerators: assessment of various Ca-based sorbent processes. Chemosphere 51(5), 335-347. DOI: [https://doi.org/10.1016/S0045-6535\(02\)00838-X](https://doi.org/10.1016/S0045-6535(02)00838-X)
- 4 Fernández Bertos, M., Li, X., Simons, S.J.R., Hills, C.D., Carey, P.J., 2004. *Investigation of accelerated carbonation for the stabilisation of MSW incinerator ashes and the sequestration of CO<sub>2</sub>*. Green Chemistry 6, 428-436. DOI: 10.1039/b401872a
- 5 EU, 2018. Best Available Techniques (BAT) Reference Document for Waste Incineration

### 11.2 Enhanced carbonation

*Peer reviewed papers*

- 1 Araizi, P.K., Hills, C.D., Maries, A., Gunning, P.J., Wray, D.S., 2016. *Enhancement of accelerated carbonation of alkaline waste residues by ultrasound*. Waste Management 50, 121-129. DOI: <http://dx.doi.org/10.1016/j.wasman.2016.01.006>
- 2 Baciocchi, R., Costa, G., Di Bartolomeo, E., Poletti, A., Pomi, R., 2009a. *The effect of accelerated carbonation on CO<sub>2</sub> uptake and metal release from incineration APC residues*. Waste Management 29(12), 2994-3003. DOI: <https://doi.org/10.1016/j.wasman.2009.07.012>
- 3 Baciocchi, R., Costa, G., Poletti, A., Pomi, R., Prigiobbe, V., 2009b. *Comparison of different reaction routes for carbonation of APC residues*. Energy Procedia 1 (1), 4851-4858. DOI: <https://doi.org/10.1016/j.egypro.2009.02.313>
- 4 Baciocchi, R., Poletti, A., Pomi, R., Prigiobbe, V., Von Zedwitz, V.N., Steinfeld, A., 2006. *CO<sub>2</sub> sequestration by direct gas-solid carbonation of air pollution control (APC) residues*. Energy Fuels 20(5), 1933-1940. DOI: <https://doi.org/10.1021/ef060135b>
- 5 Cappai, G., Cara, S., Muntoni, A., Piredda, M., 2012. *Application of accelerated carbonation on MSW combustion APC residues for metal immobilization and CO<sub>2</sub> sequestration*. Journal of Hazardous Materials 207-208, 159-164. DOI: 10.1016/j.jhazmat.2011.04.013
- 6 Ecke, H., Menad, N., Lagerkvist, A., 2002. *Treatment-oriented characterization of dry scrubber residue from municipal solid waste incineration*. Journal of Material Cycles and Waste Management 4(2), 117-126. DOI: <https://doi.org/10.1007/s10163-001-0063-x>
- 7 Fernández Bertos, M., Li, X., Simons, S.J.R., Hills, C.D., Carey, P.J., 2004. *Investigation of accelerated carbonation for the stabilisation of MSW incinerator ashes and the sequestration of CO<sub>2</sub>*. Green Chemistry 6, 428-436. DOI: 10.1039/b401872a
- 8 Gunning, P.J., Hills, C.D., Carey, P.J., 2009. *Production of lightweight aggregate from industrial waste and carbon dioxide*. Waste Management 29, 2722-2728. DOI: 10.1016/j.wasman.2009.05.021
- 9 Gunning, P., Hills, C.D., Carey, P.J., 2013. *Commercial application of accelerated carbonation: Looking back at the first year 2013*. Conference Proceedings of ACEME, 2013, pages 185-192. Abstract of the paper available online: <https://gala.gre.ac.uk/id/eprint/13577/>

- 10 Gunning, P., Hills, C.D., 2014. *Carbon negative: first commercial application of accelerated carbonation technology*. 7<sup>th</sup> International Scientific Conference: Science and Higher Education in Function of Sustainable Development, 3-4 October 2014, Uzice, Serbia. Available online: <https://pdfs.semanticscholar.org/0f3d/5fdc40eba9b1780f323b4b2b94d6a267eb9d.pdf>
- 11 Jiang, J., Tian, S., Zhang, C., 2013. *Influence of SO<sub>2</sub> in incineration flue gas on the sequestration of CO<sub>2</sub> by municipal solid waste incinerator fly ash*. Journal of Environmental Sciences 25(4), 735-740. DOI: [https://doi.org/10.1016/S1001-0742\(12\)60142-9](https://doi.org/10.1016/S1001-0742(12)60142-9)
- 12 Li, X., Fernández Bertos, M., Hills, C.D., Carey, P.J., Simon S., 2007. *Accelerated carbonation of municipal solid waste incineration fly ashes*. Waste Management 27(9), 1200-1206. DOI: <https://doi.org/10.1016/j.wasman.2006.06.011>
- 13 Prigiobbe, V., Polettini, A., Baciocchi, R., 2009. *Gas-solid carbonation kinetics of Air Pollution Control residues for CO<sub>2</sub> storage*. Chemical Engineering Journal 148(2-3), 270-278. DOI: <https://doi.org/10.1016/j.cej.2008.08.031>
- 14 Sun, J., Fernandez Bertos, M., Simons, S.J.R., 2008. *Kinetic study of accelerated carbonation of municipal solid waste incinerator air pollution control residues for sequestration of flue gas CO<sub>2</sub>*. Energy Environ. Sci. 1, 370-377  
*Patent document*
- 15 Hills, C.D. and Carey, P.J. (2017). *WIPO patent Application Number WO/201608268: Improved production of aggregates*. Available online: <https://patentscope.wipo.int/search/en/detail.jsf?docId=GB205861767&tab=NATIONALBIBLIO&cid=P10-K1J5T9-46220-1>  
*Website*
- 16 O.C.O Technology Ltd, 2019. Company website: <https://oco.co.uk/about-us/>  
*Conference presentation*
- 17 Carey, P.J., 2018. Developing an innovative and profitable process that combines waste CO<sub>2</sub> and thermal residues, to create a carbon negative aggregate for construction and lock CO<sub>2</sub> in for good within our built environment. Available online: <http://nas-sites.org/dels/files/2018/02/1-5-CAREY-Carbon8-Systems-NAS.pdf>  
*BREF document*
- 18 EU, 2018. Best Available Techniques (BAT) Reference Document for Waste Incineration

## 12. Lime use in acid mine drainage

### *Scientific paper*

- 1 Jageman et al., 1987. The use of pre-aeration to reduce the cost of neutralizing acid mine drainage. Proceedings America Society of Mining and Reclamation, 131-135. Available online: <https://www.asmr.us/Portals/0/Documents/Conference-Proceedings/1988-Volume-1/0131-Jageman.pdf>  
*Website*
- 2 Industry treatment solution for AMD (WesTech). <http://www.westech-inc.com/en-usa/industry-solutions/mineral-overview/acid-mine-drainage> (Last Access: September, 2019)

## 13. Lime use in agriculture

### 13.1 Soil neutralisation

- 1 Australian Minister for the Environment and Energy, Josh Frydenberg, 2018a. Explanatory statement - Carbon Credits (Carbon Farming Initiative - Measurement of Soil Carbon Sequestration in Agricultural Systems) Methodology Determination 2018 (Including the Supplement Document). Document of 25/01/2018. Available online: <https://www.legislation.gov.au/Details/F2018L00089>
- 2 Bernoux, M., Volkoff, B., Carvalho, M., Cerri, C.C., 2003. *CO<sub>2</sub> emissions from liming of agricultural soils in Brazil*. Global Biogeochemical Cycles 17(2), 1-4. DOI: 10.1029/2001GB001848
- 3 Biasi, C., Lind, S.E., Pekkarinen, N.M., Huttunen, J.T., Shurpali, N.J., Hyvönen, N.P., Repo, M.E., Martikainen, P.J., 2008. *Direct experimental evidence for the contribution of lime to CO<sub>2</sub> release*

from managed peat soil. *Soil Biology & Biochemistry* 40 (10), 2660-2669. DOI: [10.1016/j.soilbio.2008.07.011](https://doi.org/10.1016/j.soilbio.2008.07.011)

- 4 Cai, H., Wang, M., Han, J., 2014. *Update of the CO<sub>2</sub> emission factor from agricultural liming*. GREET Publications, Argonne National Laboratory. Available online: <https://greet.es.anl.gov/publications>
- 5 Cerri, C.C., 2010. *Management practices for greenhouse gas emission reduction and carbon removal in brazilian agriculture, livestock, and forestry*. Centro de Energia Nuclear na Agricultura - CENA/USP. Available online: <http://www.fbds.org.br/fbds/IMG/pdf/doc-410.pdf>
- 6 Cho, S.R., Jeong, S.T., Kim, G.Y., Lee, J.G., Lee, G.J., Kim, P.J., Kim, G.W., 2019. *Evaluation of the carbon dioxide (CO<sub>2</sub>) emission factor from lime applied in temperate upland soil*. *Geoderma* 337, 742-748. DOI: <https://doi.org/10.1016/j.geoderma.2018.10.007>
- 7 Hamilton, S.K., Kurzman, A.L., Arango, C., Jin, L., Robertson, G.P., 2007. *Evidence for carbon sequestration by agricultural liming*. *Global biogeochemical cycles* (21) 2, 1-12. DOI: <https://doi.org/10.1029/2006GB002738>  
[https://www.ipcc-nggip.iges.or.jp/public/2006gl/pdf/4\\_Volume4/V4\\_11\\_Ch11\\_N2O&CO2.pdf](https://www.ipcc-nggip.iges.or.jp/public/2006gl/pdf/4_Volume4/V4_11_Ch11_N2O&CO2.pdf)
- 8 Intergovernmental Panel on Climate Change, 2006. Chapter 11: *N<sub>2</sub>O emissions from managed soils and CO<sub>2</sub> emissions from lime and urea application*. In: IPCC Guidelines for National Greenhouse Gas Inventories. Available online:
- 9 Tongwane, M., Mdlambuzi, T., Moeletsi, M., Tsubo, M., Mliswa, V., Grootboom, L., 2016. *Greenhouse gas emissions from different crop production and management practices in South Africa*. *Environmental Development*, 19(90), 23-35. DOI: <https://doi.org/10.1016/j.envdev.2016.06.004>
- 10 United States Department of Agriculture - USDA, 2014. *Quantifying Greenhouse Gas Fluxes in Agriculture and Forestry: Methods for Entity-Scale inventory*. USDA Technical Bulletin 1939. Available online: [https://www.usda.gov/oce/climate\\_change/Quantifying\\_GHG/USDATB1939\\_07072014.pdf](https://www.usda.gov/oce/climate_change/Quantifying_GHG/USDATB1939_07072014.pdf)
- 11 United States Environmental Protection Agency – USEPA, 2019. *Inventory of U.S. Greenhouse Gas Emissions and Sinks 1990-2017*. Available online: <https://www.epa.gov/sites/production/files/2019-04/documents/us-ghg-inventory-2019-main-text.pdf>
- 12 West, T.O., McBride, A.C., 2005. The contribution of agricultural lime to carbon dioxide emissions in the United States: dissolution, transport, and net emissions. *Agriculture, Ecosystems and Environment* 108 (2), 145-154. DOI: <https://doi.org/10.1016/j.agee.2005.01.002>

### 13.2 Increment of soil organic carbon

- 1 Paradelo, R., Virto, I., Chenu, C., 2015. *Net effect of liming on soil organic carbon stocks: a review*. *Agriculture, Ecosystems & Environment* 202, 98-107. DOI: <https://doi.org/10.1016/j.agee.2015.01.005>
- 2 Sochorová, L., Jansa, J., Verbruggen, E., Hejman, M., Schellberg, J., Kiers, E.T., Johnson, N.C., 2016. *Long-term agricultural management maximizing hay production can significantly reduce belowground C storage*. *Agriculture, Ecosystems & Environment* 220, 104-114. DOI: <https://doi.org/10.1016/j.agee.2015.12.026>

## 14. Lime use in calcium carbide

- 1 Altiner, M., 2019. Use of Taguchi approach for synthesis of calcite particles from calcium carbide slag for CO<sub>2</sub> fixation by accelerated mineral carbonation. In: *Arabian Journal of Chemistry*, 12, 531-540. DOI: 10.1016/j.arabjc.2018.02.015
- 2 Cardoso, F. A., Fernandes, H. C., Pileggi, R. G., Cincotto, M. A., John, V. M., 2009. *Carbide lime and industrial hydrated lime characterization*. In: *Powder Technology*, 195, 143-149. DOI: 10.1016/j.powtec.2009.05.017
- 3 European Industrial Gases Association AISBL (EIGA), 2017. *Guide to carbide lime applications*. DOC 143/17.
- 4 IPCC, 2006. IPCC Guidelines for National Greenhouse Gas Inventories. Volume 3: Industrial Processes and Product Use. Chapter 3: Chemical Industry Emissions.

- 5 Jimoh, O. A., Mahmed, N., Okoye, P. U., Ariffin, K. S., 2016. Utilization of milk of lime (MOL) originated from carbide lime waste and operating parameters optimization study for potential precipitated calcium carbonate (PCC) production. In: Environmental Earth Science, 75, 1251. DOI: 10.1007/s12665-016-6053-z
- 6 Morales-Flórez, V., Santos, A., Romero-Hermida, I., Esquivias, L., 2015. *Hydration and carbonation reactions of calcium oxide by weathering: Kinetics and changes in the nanostructure*. In: Chemical Engineering Journal, 265, 194-200. DOI: 10.1016/j.cej.2014.12.062

## 15. Lime use in base and precious metals, lithium

### 15.1 Lime use in copper

*Peer reviewed papers*

- 1 Gupta, R.C., Mehra, P., Thomas, B.S., 2017. *Utilization of copper tailing in developing sustainable and durable concrete*. J. Mater. Civ. Eng. 29(5), 04016274. DOI: <https://ascelibrary.org/doi/10.1061/%28ASCE%29MT.1943-5533.0001813>
- 2 Moura, W.A., Goncalves, J.P., Lima, M.B.L., 2007. *Copper slag waste as a supplementary cementing material to concrete*. J. Mater. Sci. 42(7), 2226-2230. DOI: <https://doi.org/10.1007/s10853-006-0997-4>
- 3 Sharma, R. and Khan, R.A., 2017. *Durability assessment of self compacting concrete incorporating copper slag as fine aggregates*. Construction and Building Materials 155, 617-629. DOI: <https://doi.org/10.1016/j.conbuildmat.2017.08.074>
- 4 Shi, C., Meyer, C., Behnood, A., 2008. *Utilization of copper slag in cement and concrete*. Resources, Conservation and Recycling 52(10), 1115-1120. DOI: <https://doi.org/10.1016/j.resconrec.2008.06.008>

### 15.2 Lime use in nickel

*Peer reviewed papers*

- 1 Assima, G.P., Larachi, F., Molson, J., Beaudoin, G., 2014. *Impact of temperature and oxygen availability on the dynamics of ambient CO<sub>2</sub> mineral sequestration by nickel mining residues*. Chemical Engineering Journal 240, 394-403. DOI: <https://doi.org/10.1016/j.cej.2013.12.010>
- 2 Bodéan, F., Bourgeois, F., Petiot, C., Augé, T., Bonfils, B., Julcour-Lebigue, C., Guyot, F., Boukary, A., Tremosa, J., Lassin, A., Gaucher, E.C., Chiquet, P., 2014. *Ex situ mineral carbonation for CO<sub>2</sub> mitigation: Evaluation of mining waste resources, aqueous carbonation processability and life cycle assessment (Carmex project)*. Minerals Engineering 59, 52-63. DOI: <https://doi.org/10.1016/j.mineng.2014.01.011>
- 3 Choi, Y.C. and Choi, S., 2015. Alkali-silica reactivity of cementitious materials using ferro-nickel slag fine aggregates produced in different cooling conditions. Construction and Building Materials 99, 279-287. DOI: <https://doi.org/10.1016/j.conbuildmat.2015.09.039>
- 4 Coto, O., Galizia, F., Hernández, I., Marrero, J., Donati, E., 2008. *Cobalt and nickel recoveries from laterite tailings by organic and inorganic bio-acids*. Hydrometallurgy 94(1-4), 18-22. DOI: <https://doi.org/10.1016/j.hydromet.2008.05.017>
- 5 Hernández, C.M.F., Banza, A.N., Gock, E., 2007. *Recovery of metals from Cuban nickel tailings by leaching with organic acids followed by precipitation and magnetic separation*. Journal of Hazardous Materials B139 (1-2), 25-30. DOI: <https://doi.org/10.1016/j.jhazmat.2006.03.074>
- 6 Kalinkin, A.M., Kumar, S., Gurevich, B.I., Alex, T.C., Kalinkina, E.V., Tyukavkina, V.V., Kalinnikov, V.T., Kumar, R., 2012. *Geopolymerization behavior of Cu-Ni slag mechanically activated in air and in CO<sub>2</sub> atmosphere*. International Journal of Mineral Processing 112-113, 101-106. DOI: <https://doi.org/10.1016/j.minpro.2012.05.001>
- 7 Mu, W.N., Zhai, Y.C., Liu, Y., 2010. *Leaching of magnesium from desiliconization slag of nickel laterite ores by carbonation process*. Trans. Nonferrous Met. Soc. China 20 (Supplement 1), s87-s91. DOI: [https://doi.org/10.1016/S1003-6326\(10\)60018-0](https://doi.org/10.1016/S1003-6326(10)60018-0)

- 8 Samnur, S., Husain, H., Zulfi, A., Sujiono, E.H., 2016. *Study on physical-chemical properties of furnace-nickel-slag powder for geopolymer application*. Jurnal Pendidikan Fisika Indonesia 12(2), 177-182. DOI: <https://journal.unnes.ac.id/nju/index.php/JPLI/article/view/4728>
- 9 Yang, T., Wu, Q., Zhu, H., Zhang, Z., 2017. *Geopolymer with improved thermal stability by incorporating high-magnesium nickel slag*. Construction and Building Materials 155, 475-484. DOI: <https://doi.org/10.1016/j.conbuildmat.2017.08.081>  
*Patent document*
- 10 Kerfoot, D.G.E., Krause, E., Love, B.J., Singhal, A., 2002. *Hydrometallurgical process for the recovery of nickel and cobalt values from a sulfidic flotation concentrate*. Patent no. US 6428604 B1. Available online: <https://www.lens.org/lens/patent/100-251-960-219-790>  
*Conference papers*
- 11 Beaudoin, G., Nowamooz, A., Assima, G.P., et al., 2017. *Passive mineral carbonation of Mg-rich mine wastes by atmospheric CO<sub>2</sub>*. Energy Procedia 114, 6083-6086. DOI: <https://doi.org/10.1016/j.egypro.2017.03.1745>
- 12 Chae, S., Jang, Y., Jun, C., Lee, S., Bang, J., Song, K., Cho, H., Lee, M., 2014. *Mineral carbonation with ferrous nickel slag*. Proceedings of the 4<sup>th</sup> International Conference on Environmental Pollution and Remediation. Prague, 11-13 August 2014. Available online: [https://avestia.com/ICEPR2014\\_Proceedings/papers/85.pdf](https://avestia.com/ICEPR2014_Proceedings/papers/85.pdf)
- 13 Norgate, T. and Rankin, W., 2000. *Life cycle assessment of copper and nickel production*. Proceeding of the Minprex Conference, 11-13- September 2000 Melbourne, 133-138
- 14 Siegrist, M., Southam, C., Bowman, G., Wilson, S.A., Southam, G., 2017. Analysis of the potential for negative CO<sub>2</sub> emission mine sites through bacteria-mediated carbon mineralization: evidence from Australia. Energy Procedia 114, 6124-6132. DOI: <https://doi.org/10.1016/j.egypro.2017.03.1749>

### 15.3 Lime use in zinc and lead

#### *Peer reviewed papers*

- 1 Barna, R., Moskowicz, P., Gervais, C., 2004. *Leaching assessment of road materials containing primary lead and zinc slags*. Waste management 24(9), 945-955. DOI: [10.1016/j.wasman.2004.07.014](https://doi.org/10.1016/j.wasman.2004.07.014)
- 2 Coxa, B., Maranon, E., Sastre, H., 2000. *Ecotoxicity assessment of slag generated in the process of recycling lead from waste batteries*. Resources, Conservation and Recycling 29(4), 291-300. DOI: [https://doi.org/10.1016/S0921-3449\(00\)00054-9](https://doi.org/10.1016/S0921-3449(00)00054-9)
- 3 Ettler, V., Legendre, O., Bodéan, F., Touray, J.C., 2001. *Primary phases and natural weathering of old lead-zinc pyrometallurgical slag from Příbram, Czech Republic*. The Canadian Mineralogist 39(3), 873-888. DOI: <https://doi.org/10.2113/gscanmin.39.3.873>
- 4 Ettler, V., Komárková, M., Jehlicka, J., Coufal, P., Hradil, D., Machovic, V., Delorme, F., 2004. *Leaching of lead metallurgical slag in citric solutions. Implications for disposal and weathering in soil environments*. Chemosphere 57(7), 567-577. DOI: [10.1016/j.chemosphere.2004.07.022](https://doi.org/10.1016/j.chemosphere.2004.07.022)
- 5 De Andrade Lima, L.R.P., Bernandez, L.A., 2011. *Characterization of the lead smelter slag in Santo Amaro, Bahia, Brazil*. Journal of Hazardous Materials 189(3), 692-699. DOI: [10.1016/j.jhazmat.2011.02.091](https://doi.org/10.1016/j.jhazmat.2011.02.091)
- 6 Ogundiran et al., 2013. Immobilisation of lead smelting slag within spent aluminate-fly ash based Ogundiran, M.B., Nugteren, H.W., Witkamp, G.J., 2013. *Immobilisation of lead smelting slag within spent aluminate-fly ash based geopolymers*. Journal of Hazardous Materials 248-249, 29-36. DOI: <https://doi.org/10.1016/j.jhazmat.2012.12.040>
- 7 Onisei, S., Pontikes, Y., Van Gerven, T., Angelopoulos, G.N., Velea, T., Predica, V., Moldovan, P., 2012. *Synthesis of inorganic polymers using fly ash and primary lead slag*. Journal of Hazardous Materials 205-206, 101-110. DOI: <https://doi.org/10.1016/j.jhazmat.2011.12.039>
- 8 Penpolcharoen, M., 2005. *Utilization of secondary lead slag as construction material*. Cement and Concrete Research 35(6), 1050-1055. DOI: <https://doi.org/10.1016/j.cemconres.2004.11.001>



- 9 Seignez, N., Bulteel, D., Damidot, D., Gauthier, A., Potdevin, J.L., 2006. *Weathering of metallurgical slag heaps: multi-experimental approach of the chemical behaviours of lead and zinc*. WIT Transaction on Ecology and the Environment 92, 31-40. DOI: 10.2495/WM060041
- 10 Seignez, N., Gauthier, A., Bulteel, D., Buatier, M., Recourt, P., Damidot, D., Potdevin, J.L., 2007. *Effect of Pb-rich and Fe-rich entities during alteration of a partially vitrified metallurgical waste*. Journal of Hazardous Materials 149(2), 418-431. DOI: 10.1016/j.jhazmat.2007.04.007
- 11 Seignez, N., Gauthier, A., Bulteel, D., Daminot, D., Potdevin, J.L., 2008. *Leaching of lead metallurgical slags and pollutant mobility far from equilibrium conditions*. Applied Geochemistry 23, 3699-3711. DOI: 10.1016/j.apgeochem.2008.09.009
- 12 Sobanska, S., Ledésert, B., Deneele, D., Laboudigue, A., 2000. Alteration in soils of slag particles resulting from lead smelting. C.D. Acad. Sci. Paris, Sciences del la Terre et des planetes 331, 271-278
- 13 Piatak, N.M. and Seal II, R.R., 2010. *Mineralogy and the release of trace elements from slag from the Hegeler Zinc smelter, Illinois (USA)*. Applied Geochemistry 25(2), 302-320. DOI: <https://doi.org/10.1016/j.apgeochem.2009.12.001>
- 14 Mao, Y., Muhammad, F., Yu, L., Xia, M., Huang, X., Jiao, B., Shiao, Y.C., Li, D., 2019. *The solidification of lead-zinc smelting slag through bentonite supported alkali-activated slag cementitious material*. International Journal of Environmental Research and Public Health 16(7), 1121. DOI: 10.3390/ijerph16071121
- 15 Bascetin, A., Tuylu, S., 2017. *Application of Pb-Zn tailings for surface paste disposal: geotechnical and geochemical observations*. International Journal of Mining, Reclamation and Environment 32(5), 312-326. DOI: <https://doi.org/10.1080/17480930.2017.1282411>
- 16 Khalil, A., Argane, R., Benzaazoua, M., Bouzahzah, H., Taha, Y., Hakkou, R., 2019. *Pb-Zn mine tailings reprocessing using centrifugal dense media separation*. Minerals Engineering, 131, 28-37. DOI: <https://doi.org/10.1016/j.mineng.2018.10.023>
- 17 Nouairi, J., Hajjaji, W., Costa, S.C., Senff, L., Patinha, C., Ferreira da Silva, E., Labrincha, J.A., Rocha, F., Medhioub, M., 2018. *Study on Zn-Pb ore tailings and their potential in cement technology*. Journal of African Earth Sciences 139, 165-172. DOI: <https://doi.org/10.1016/j.jafrearsci.2017.11.004>
- 18 Othmani, M.A., Souissi, F., Bouzahzah, H., Bussière, B., da Silva, E.F., Benzaazoua, M., 2015. The flotation tailings of the former Pb-Zn mine of Touiref (NW Tunisia): mineralogy, mine drainage prediction, base-metal speciation assessment and geochemical modeling. Environ. Sci. Pollut. Res. 22(4), 2877-2890. DOI: <https://www.ncbi.nlm.nih.gov/pubmed/25220771>
- 19 Tysza, R., Kierczak, J., Pietranik, A., et al., 2014. Extensive weathering of zinc smelting slag in a heap in upper Silesia (Poland): potential environmental risks posed by mechanical disturbance of slag deposits. Applied Geochemistry 40, 70-81
- 20 Vanaecker, M., Courtin-Nomade, A., Bril, H., Laureyns, J., Lenain, J.F., 2014. Behavior of Zn-bearing phases in base metal slag from France and Poland: a mineralogical approach for environmental purposes. Journal of Geochemical Exploration 136, 1-13
- Patent document
- 21 Forrester, K.E., 2006. *Method for stabilization of lead smelter slag and matte*. US Patent n. 7,121,995B2. Available online: <https://patents.google.com/patent/US7121995>
- Conference paper
- 22 Palamini, C., Mapelli, C., Barella, S., Mombelli, D., 2018. *The Waelz process: state of the art and innovation to decrease the environmental impact*. Proceedings of the 4<sup>th</sup> European Conference on Clean Technologies in the Steel Industry, Bergamo, 28-29 November 2018

## 15.4 Lime use in gold

### Peer reviewed papers

- 1 Hasan, S.N.M.S., Kusin, F.M., Jusop, S., Yusuff, F.M., 2018. *Potential of soil, sludge and sediment for mineral carbonation process in Selinsing gold mine, Malaysia*. Minerals 8, 257-271. DOI: <https://doi.org/10.3390/min8060257>

- 2 Paktunc, D., Foster, A., Heald, S., Laflamme, G., 2004. *Speciation and characterization of arsenic in gold ores and cyanidation tailings using X-ray absorption spectroscopy*. *Geochimica et Cosmochimica Acta* 68(5), 969-983. DOI: <https://doi.org/10.1016/j.gca.2003.07.013>
- 3 Zagury, G.J., Oudjehani, K., Deschênes, L., 2004. *Characterization and availability of cyanide in solid mine tailings from gold extraction plants*. *Science of the Total Environment* 320(2-3), 211-224. DOI: <https://doi.org/10.1016/j.scitotenv.2003.08.012>  
*PhD Thesis*
- 4 Hamberg, R., 2014. *Characterization and solidification of Arsenic-rich cyanided tailings*. PhD Thesis, Luleå University of Technology

## 15.5 Lime use in platinum

### *Peer reviewed papers*

- 1 Meyer et al., 2014. Mineral carbonation of PGM mine tailings for CO<sub>2</sub> storage in South Africa: a case study. *Minerals Engineering* 59, 45-51. DOI: <https://doi.org/10.1016/j.mineng.2013.10.014>
- 2 Ncongwane, M.S., Broadhurst, J.L., Petersen, J., 2018. *Assessment of the potential carbon footprint of engineered processes for the mineral carbonation of PGM tailings*. *International Journal of Greenhouse Gas Control* 77, 70-81. DOI: <https://doi.org/10.1016/j.ijggc.2018.07.019>
- 3 Vogeli, J., Reid, D.L., Becker, M., Broadhurst, J., Franzidis, J.P., 2011. *Investigation of the potential for mineral carbonation of PGM tailings in South Africa*. *Minerals Engineering* 24(12), 1348-1356. DOI: <https://doi.org/10.1016/j.mineng.2011.07.005>

### *Conference paper*

- 4 Amponsah-Dacosta, M., Reid, D.L., 2014. *Mineralogical characterization of selected South African Mine tailings for the purpose of mineral carbonation*. Proceedings of the Annual International Mine Water association Conference-An Interdisciplinary Response to Mine Water Challenges. Xuzhou, China. Available online: [https://www.imwa.info/docs/imwa\\_2014/IMWA2014\\_Amponsah-Dacosta\\_686.pdf](https://www.imwa.info/docs/imwa_2014/IMWA2014_Amponsah-Dacosta_686.pdf)

## 15.6 Lime use in lithium

### *Peer reviewed papers*

- 1 Chen, D., Hu, X., Shi, L., Cui, Q., Wang, H., Yao, H., 2012. *Synthesis and characterization of zeolite X from lithium slag*. *Applied Clay Science* 59-60, 148-151. DOI: <https://doi.org/10.1016/j.clay.2012.02.017>
- 2 Choubey, P.K., Kim, M.S., Srivastava, R.R., Lee, J.C., Lee, J.Y., 2016. *Advance review on the exploitation of the prominent energy-storage element: Lithium. Part I: from mineral and brine resources*. *Minerals Engineering* 89, 119-137. DOI: <https://doi.org/10.1016/j.mineng.2016.01.010>
- 3 He, Z.H., Li, L.Y., Du, S.G., 2017. *Mechanical properties, drying shrinkage, and creep of concrete containing lithium slag*. *Construction and Building Materials* 147, 296-304. DOI: <https://doi.org/10.1016/j.conbuildmat.2017.04.166>
- 4 He, Z.H., Du, S.G., Chen, D., 2018. *Microstructure of ultra high performance concrete containing lithium slag*. *Journal of Hazardous Materials* 353, 35-43. DOI: <https://doi.org/10.1016/j.jhazmat.2018.03.063>
- 5 Lin, G., Zhuang, Q., Cui, Q., Wang, H., Yao, H., 2015. *Synthesis and adsorption property of zeolite FAU/LTA from lithium slag with utilization of mother liquid*. *Chinese Journal of Chemical Engineering* 23(11), 1768-1773. DOI: <https://doi.org/10.1016/j.cjche.2015.10.001>
- 6 Meshram, P., Pandey, B.D., Mankhand, T.R., 2014. *Extraction of lithium from primary and secondary sources by pre-treatment, leaching and separation: a comprehensive review*. *Hydrometallurgy* 150, 192-208. DOI: <https://www.sciencedirect.com/science/article/pii/S0304386X14002278>
- 7 Tan, H., Li, X., He, C., Ma, B., Bai, Y., Luo, Z., 2015. *Utilization of lithium slag as an admixture in blended cements: physico-mechanical and hydration characteristics*. *Journal of Wuhan University of Technology-Mater. Sci. Ed.* 30(1), 129-1233. DOI: <https://doi.org/10.1007/s11595-015-1113-x>



- 8 Yan, Q., Li, X., Yin, Z., Wang, Z., Guo, H., Peng, W., Hu, Q., 2012a. *A novel process for extracting lithium from lepidolite*. Hydrometallurgy 121-124, 54-59. DOI: <https://doi.org/10.1016/j.hydromet.2012.04.006>
- 9 Yan, Q., Li, X., Wang, Z., Wu, X., Wang, W., Wang, J., Guo, H., Hu, Q., Peng, W., 2012b. *Extraction of lithium from lepidolite by sulfation roasting and water leaching*. International Journal of Mineral Processing 110-111, 1-5. DOI: <https://doi.org/10.1016/j.minpro.2012.03.005>
- 10 Yiren, W., Domgmin, W., Yong, C., Dapeng, Z., Ze, L., 2019. *Micro-morphology and phase composition of lithium slag from lithium carbonate production by sulphuric acid process*. Construction and Building Materials 203, 304-313. DOI: <https://doi.org/10.1016/j.conbuildmat.2019.01.099>  
*Conference paper*
- 11 Luo, Q., Huang, S., Zhou, Y., Li, J., Peng, W., Wen, Y., 2017. *Influence of lithium slag from lepidolite on the durability of concrete*. Proceedings of the 3<sup>rd</sup> International Conference on Energy Materials and Environmental Engineering. IOP Conf, Series: Earth and Environmental Science 61 012151. Available online: [https://www.researchgate.net/publication/316347227\\_Influence\\_of\\_lithium\\_slag\\_from\\_lepidolite\\_on\\_the\\_durability\\_of\\_concrete](https://www.researchgate.net/publication/316347227_Influence_of_lithium_slag_from_lepidolite_on_the_durability_of_concrete)  
*Patent documents*
- 12 Boryta, D.A., Kullberg, T.F., Thurston, A.M., 2011. *Production of lithium compounds directly from lithium containing brines*. United States Patent US 7449161B2. Available online: <https://patents.google.com/patent/US7449161B2/en>
- 13 Kroll, A.V., 1953. Method of recovering lithium compounds from lithium minerals. United States Patent US 2,662,809.

## 16. Lime use in titanium dioxide production – red gypsum

### *Peer reviewed papers*

- 1 Azdarpour, A., Asadullah, M., Junin, R., Manan, M., Hamidi, H., Mohammadian, E., 2014. *Direct carbonation of red gypsum to produce solid carbonates*. Fuel Processing Technology 126, 429-434. DOI: <https://doi.org/10.1016/j.fuproc.2014.05.028>
- 2 Azdarpour, A., Asadullah, M., Mohammadian, E., Junin, R., Hamidi, H., Manan, M., Daud, A.R.M., 2015. *Mineral carbonation of red gypsum via pH-swing process: effect of CO<sub>2</sub> pressure on the efficiency and products characteristics*. Chemical Engineering Journal 264, 425-436. DOI: <https://doi.org/10.1016/j.cej.2014.11.125>
- 3 Azdarpour, A., Karaei, M.A., Hamidi, H., Mohammadian, E., Honarvar, B., 2018. *CO<sub>2</sub> sequestration through direct aqueous mineral carbonation of red gypsum*. Petroleum 4(4), 398-407. DOI: <https://doi.org/10.1016/j.petlm.2017.10.002>
- 4 Pérez-Moreno, S.M., Gázquez, M.J., Bolívar, J.P., 2015. *CO<sub>2</sub> sequestration by indirect carbonation of artificial gypsum generated in the manufacture of titanium dioxide pigments*. Chemical Engineering Journal 262, 737-746. DOI: <https://doi.org/10.1016/j.cej.2014.10.023>
- 5 Rahmani, O., Tyrer, M., Junin, R., 2014a. *Calcite precipitation from by-product red gypsum in aqueous carbonation process*. RCS Advances 4, 45548-45557. DOI: 10.1039/c4ra05910g
- 6 Rahmani, O., Junin, R., Tyrer, M., Mohsin, R., 2014b. *Mineral carbonation of red gypsum for CO<sub>2</sub> sequestration*. Energy Fuels 28, 5953-5958. DOI: [dx.doi.org/10.1021/ef501265z](https://doi.org/10.1021/ef501265z)
- 7 Rahmani, O., Kadkhodaie, A., Highfield, J., 2016. *Kinetics analysis of CO<sub>2</sub> mineral carbonation using byproduct red gypsum*. Energy Fuels 30(9), 7460-7464. DOI: <https://doi.org/10.1021/acs.energyfuels.6b00246>

## 17. Lime use in aluminium production – red mud

### *Peer reviewed papers*

- 1 Bonenfant, D., Kharoune, L., Sauvé, S., Hausler, R., Niquette, P., Mimeault, M., Kharoune, M., 2008. *CO<sub>2</sub> sequestration by aqueous red mud carbonation at ambient pressure and temperature*. Ind. Eng. Chem. Res. 47(20), 7617-7622. DOI: 10.1021/ie7017228

- 2 Clark, M.W., Johnston, M., Reichelt-Brushett, A., 2015. Comparison of several different neutralisations to a bauxite refinery residue: potential effectiveness environmental ameliorants. *Applied Geochemistry* 56, 1-21. DOI: 10.1016/j.apgeochem.2015.01.015
- 3 Dillmore, R., Lu, P., Allen, D., Soong, Y., Hedges, S., Fu, J.K., Dobbs, C.L., Degalbo, A., Zhu, C., 2008. *Sequestration of CO<sub>2</sub> in mixtures of bauxite residue and saline wastewater*. *Energy Fuels* 22(1),343-353. DOI: <https://doi.org/10.1021/ef7003943>
- 4 Han, Y.S., Ji, S., Lee, P.K., Oh, C., 2017. *Bauxite residue neutralization with simultaneous mineral carbonation using atmospheric CO<sub>2</sub>*. *Journal of Hazardous Materials* 326, 87-93. DOI: [10.1016/j.jhazmat.2016.12.020](https://doi.org/10.1016/j.jhazmat.2016.12.020)
- 5 Johnston, M., Clark, M.W., McMahon, P., Ward, N., 2010. *Alkalinity conversion of bauxite refinery residues by neutralization*. *Journal of Hazardous Materials* 182(1-3), 710-715. DOI: 10.1016/j.jhazmat.2010.06.091
- 6 Jones, G., Joshi, G., Clark, M.W., McConchie, D.M., 2006. *Carbon capture and the aluminium industry: preliminary studies*. *Environ. Chem.* 3(4), 297-303. DOI: 10.1071/EN06018
- 7 Rivera, R.M., Ounoughene, G., Borra, C.R., Binnemans, K., 2017. *Neutralisation of bauxite residue by carbon dioxide prior to acidic leaching for metal recovery*. *Minerals Engineering* 112, 92-102. DOI: [10.1016/j.mineng.2017.07.011](https://doi.org/10.1016/j.mineng.2017.07.011)
- 8 Sahu, R.C., Patel, R.K., Ray, B.C., 2010. *Neutralization of red mud using CO<sub>2</sub> sequestration cycle*. *Journal of hazardous materials* 179(1-3), 28-34. DOI: 10.1016/j.jhazmat.2010.02.052
- 9 Shi, C., Xu, J., Beckman, E., Enick, R., 2000. *Carbon dioxide sequestration via pH reduction of red mud using liquid CO<sub>2</sub>*. *ACS Div. Fuel Chem.* 45, 703-705
- 10 Si, C., Ma, Y., Lin, C., 2013. *Red mud as a carbon sink: variability, affecting factors and environmental significance*. *Journal of Hazardous Materials* 244-245, 54-59. DOI: <http://dx.doi.org/10.1016/j.jhazmat.2012.11.024>
- 11 Yadav, V.S., Prasad, M., Khan, J., Amritphale, S.S., Singh, M., Raju, C.B., 2010. *Sequestration of carbon dioxide (CO<sub>2</sub>) using red mud*. *Journal of Hazardous Materials* 176(1-3), 1044-1050. DOI: <https://doi.org/10.1016/j.jhazmat.2009.11.146>
- 12 Alcoa, 2005. *Alcoa World Alumina Australia. Pinjarra Alumina refinery efficiency upgrade. Greenhouse Gas management plan 2005*. [https://www.alcoa.com/australia/en/pdf/Greenhouse\\_Management\\_Plan\\_Final\\_Feb\\_07.pdf](https://www.alcoa.com/australia/en/pdf/Greenhouse_Management_Plan_Final_Feb_07.pdf) (latest access 28-2-2019)

## 18. Lime use in pulp and paper – Precipitated Calcium Carbonate (PCC)

### 18.1 Precipitated Calcium Carbonate – Traditional

- 1 European Commission, 2007. Reference Document on Best Available Techniques (BREF) for the Manufacture of Large Volume Inorganic Chemicals - Solids and Others Industry. Available online: [https://eippcb.jrc.ec.europa.eu/reference/BREF/lvic-s\\_bref\\_0907.pdf](https://eippcb.jrc.ec.europa.eu/reference/BREF/lvic-s_bref_0907.pdf)

### 18.2 Precipitated Calcium Carbonate – Slag

- 1 Bilen, M., Altiner, M., Yildirim, M., 2018. *Evaluation of steelmaking slag for CO<sub>2</sub> fixation by leaching-carbonation process*. *Particulate Science and Technology* 36(3), 368-377. DOI: <https://doi.org/10.1080/02726351.2016.1267285>
- 2 Chiang, Y.W., Santos, R.M., Elsen, J., Meesschaert, B., Martens, J.A., Van Gerven, T., 2014. *Towards zero-waste mineral carbon sequestration via two-way valorization of ironmaking slag*. *Chemical Engineering Journal*, 249, 260-269. DOI: <http://dx.doi.org/10.1016/j.cej.2014.03.104>
- 3 Eloneva, S., Teir, S., Salminen, J., Fogelholm, C.-J., Zevenhoven, R., 2008. *Steel converter slag as a raw material for precipitation of pure calcium carbonate*. *Industrial & Engineering Chemistry Research* 47(18), 7104-7111. DOI: <https://doi.org/10.1021/ie8004034>
- 4 Eloneva, S., Teir, S., Revitzer, H., Salminen, J., Said, A., Fogelholm, C.-J., Zevenhoven, R., 2009. *Reduction of CO<sub>2</sub> emissions from steel plants by using steelmaking slags for production of*

- marketable calcium carbonate*. Process Metallurgy 80(6), 415-421. DOI: <https://doi.org/10.2374/SRI09SP028>
- 5 Eloneva, S., 2010. *Reduction of CO<sub>2</sub> emissions by mineral carbonation: steelmaking slags as raw material with a pure calcium carbonate end product*. Doctoral thesis, Aalto University, Faculty of Engineering and Architecture, Department of Energy Technology. Available online: <https://aaltodoc.aalto.fi/handle/123456789/4876>
  - 6 Jo, H., Lee, M.-G., Park, J., Jung, K.-D., 2017. *Preparation of high-purity nano-CaCO<sub>3</sub> from steel slag*. Energy 120, 884-894. DOI: <https://doi.org/10.1016/j.energy.2016.11.140>
  - 7 Kodama, S., Nishimoto, T., Yamamoto, N., Yogo, K., Yamada, K., 2008. *Development of a new pH-swing CO<sub>2</sub> mineralization process with a recyclable reaction solution*. Energy 33(5), 776-784. DOI: <https://doi.org/10.1016/j.energy.2008.01.005>
  - 8 Kunzler, C., Alves, N., Pereira, E., Nienczewski, J., Ligabue, R., Einloft, S., Dullius, J., 2011. *CO<sub>2</sub> storage with indirect carbonation using industrial waste*. Energy Procedia 4, 1010-1017. DOI: <https://doi.org/10.1016/j.egypro.2011.01.149>
  - 9 Mattila, H.-P., Grigaliūnaite, I., Zevenhoven, R. 2012(a). Chemical kinetics modelling and process parameter sensitivity for precipitated calcium carbonate production from steelmaking slags. Chemical Engineering Journal 192, 77-89. DOI: <https://doi.org/10.1016/j.cej.2012.03.068>
  - 10 Mattila, H.-P., Grigaliūnaite, I., Said, A., Filppula, S., Fogelholm, C.-J., Zevenhoven, R., 2012(b). *Process efficiency and optimisation of precipitated calcium carbonate (PCC) production from steel converter slag*. In: Proceedings of ECOS 2012, 25<sup>th</sup> International Conference on Efficiency, Cost, Optimization, Simulation and Environmental Impact of Energy Systems, June 26-29, 2012, Perugia, Italy. Available online: <https://pdfs.semanticscholar.org/581e/8b24ca9bae6386ca5f0bbd56e260c3f809e1.pdf>
  - 11 Mattila, H.P., 2014. *Utilization of steelmaking waste materials for production of calcium carbonate (CaCO<sub>3</sub>)*. Doctoral thesis, Åbo Akademi University, Department of Chemical Engineering. Available online: <https://www.doria.fi/handle/10024/99011>
  - 12 Noack, C.W., Dzombak, D.A., Nakles, D.V., Hawthorne, S.B., Heebink, L.V., Dando, N., Gershenzon, M., Ghosh, R.S., 2014. *Comparison of alkaline industrial wastes for aqueous mineral carbon sequestration through a parallel reactivity study*. Waste Management 34(10), 1815-1822. DOI: <https://doi.org/10.1016/j.wasman.2014.03.009>
  - 13 Said, A., Laukkanen, T., Järvinen, M., 2016. *Pilot-scale experimental work on carbon dioxide sequestration using steelmaking slag*. Applied Energy 177, 602-611. DOI: <https://doi.org/10.1016/j.apenergy.2016.05.136>
